# Supplementary material
Source: ML conference proceedings conference paper supplement (https://proceedings.neurips.cc/paper_files/paper/2021/hash/08d562c1eedd30b15b51e35d8486d14c-Abstract.html)
Supplement: Supplementary file 1 [file 08d562c1eedd30b15b51e35d8486d14c-Supplemental.pdf]

# A Appendix

## Contents of main article and appendix

|                                                            |    |
|------------------------------------------------------------|----|
| <b>1 Introduction</b>                                      | 1  |
| <b>2 Related Work</b>                                      | 2  |
| <b>3 Contributions</b>                                     | 3  |
| <b>4 Background</b>                                        | 3  |
| 4.1 RL as an LP . . . . .                                  | 3  |
| 4.2 Regularized Policy Search . . . . .                    | 4  |
| <b>5 Relative Entropy Policy Search</b>                    | 5  |
| 5.1 Structural results for the REPS objective . . . . .    | 6  |
| 5.2 Convergence rates . . . . .                            | 7  |
| <b>6 Stochastic Gradients</b>                              | 8  |
| <b>7 Conclusion</b>                                        | 9  |
| <b>A Appendix</b>                                          | 12 |
| <b>B Geometry of regularized Linear Programs</b>           | 14 |
| B.1 Proof of Lemma 2 . . . . .                             | 14 |
| B.2 Proof of Lemma 3 . . . . .                             | 15 |
| <b>C Proof of Lemma 4</b>                                  | 15 |
| <b>D Proof of Lemma 5</b>                                  | 17 |
| <b>E Convergence rates for REPS</b>                        | 18 |
| E.1 Proof of Theorem 2 . . . . .                           | 19 |
| <b>F Accelerated Gradient Descent</b>                      | 20 |
| <b>G Stochastic Gradient Descent</b>                       | 20 |
| <b>H Stochastic Gradients Analysis</b>                     | 22 |
| H.1 Estimating the Gradients . . . . .                     | 25 |
| H.2 Biased Stochastic Gradients . . . . .                  | 27 |
| H.3 Proof of Lemma 10 . . . . .                            | 31 |
| <b>I Extended Results for Tsallis Entropy Regularizers</b> | 32 |
| I.0.1 Strong Convexity of Tsallis Entropy . . . . .        | 32 |

|                                                      |    |
|------------------------------------------------------|----|
| I.1 Tsallis entropy version of Lemma 4               | 33 |
| I.2 Extension of Lemma 5 to Tsallis Entropy          | 35 |
| I.3 Gradient descent results for the Tsallis Entropy | 36 |

## B Geometry of regularized Linear Programs

We start by fleshing out the connection between strong convexity and smoothness charted in Lemma 1.

**Lemma 1.** *If  $F$  is  $\beta$ -strongly convex w.r.t.  $\|\cdot\|$  over  $\mathcal{D}$  then  $F^*$  is  $\frac{1}{\beta}$ -smooth w.r.t the dual  $\|\cdot\|_*$ .*

*Proof.* Let  $\mathbf{u}, \mathbf{w} \in \mathbb{R}^n$  and  $\mathbf{x}, \mathbf{y} \in \mathcal{D}$  be such that  $\nabla F^*(\mathbf{u}) = \mathbf{x}$  and  $\nabla F^*(\mathbf{w}) = \mathbf{y}$ . By definition this also implies that:

$$\begin{aligned}\langle \nabla F(\mathbf{x}) - \mathbf{u}, \mathbf{z}_1 - \mathbf{x} \rangle &\geq 0, \quad \forall \mathbf{z} \in \mathcal{D} \\ \langle \nabla F(\mathbf{y}) - \mathbf{w}, \mathbf{z}_2 - \mathbf{y} \rangle &\geq 0, \quad \forall \mathbf{z} \in \mathcal{D}\end{aligned}$$

Setting  $\mathbf{z}_1 = \mathbf{y}$  and  $\mathbf{z}_2 = \mathbf{x}$  along with the definition of  $\mathbf{x}, \mathbf{y}$  and summing the two inequalities:

$$\langle \nabla F(\mathbf{x}) - \nabla F(\mathbf{y}), \mathbf{y} - \mathbf{x} \rangle \geq \langle \nabla F^*(\mathbf{w}) - \nabla F^*(\mathbf{u}), \mathbf{u} - \mathbf{w} \rangle. \quad (8)$$

By strong convexity of  $F$  over domain  $\mathcal{D}$  we see that:

$$\begin{aligned}F(\mathbf{x}) &\geq F(\mathbf{y}) + \langle \nabla F(\mathbf{y}), \mathbf{x} - \mathbf{y} \rangle + \frac{\beta}{2} \|\mathbf{x} - \mathbf{y}\|^2 \\ F(\mathbf{y}) &\geq F(\mathbf{x}) + \langle \nabla F(\mathbf{x}), \mathbf{y} - \mathbf{x} \rangle + \frac{\beta}{2} \|\mathbf{x} - \mathbf{y}\|^2\end{aligned}$$

Summing both inequalities yields:

$$\beta \|\mathbf{x} - \mathbf{y}\|^2 \leq \langle \nabla F(\mathbf{x}) - \nabla F(\mathbf{y}), \mathbf{x} - \mathbf{y} \rangle$$

Plugging in the definition of  $\mathbf{u}$  and  $\mathbf{w}$  along with inequality 8:

$$\beta \|\nabla F^*(\mathbf{u}) - \nabla F^*(\mathbf{w})\|^2 \leq \langle \mathbf{u} - \mathbf{w}, \nabla F^*(\mathbf{u}) - \nabla F^*(\mathbf{w}) \rangle \stackrel{(i)}{\leq} \|\mathbf{u} - \mathbf{w}\|_* \|\nabla F^*(\mathbf{u}) - \nabla F^*(\mathbf{w})\|.$$

Where inequality (i) holds by Cauchy-Schwartz and consequently:

$$\|\nabla F^*(\mathbf{u}) - \nabla F^*(\mathbf{w})\| \leq \frac{1}{\beta} \|\mathbf{u} - \mathbf{w}\|_*$$

By the mean value theorem there exists  $\mathbf{z} \in [\mathbf{u}, \mathbf{w}]$ :

$$\begin{aligned}F^*(\mathbf{u}) &= F^*(\mathbf{w}) + \langle \nabla F^*(\mathbf{z}), \mathbf{w} - \mathbf{u} \rangle \\ &= F^*(\mathbf{w}) + \langle \nabla F^*(\mathbf{w}), \mathbf{w} - \mathbf{u} \rangle + \langle \nabla F^*(\mathbf{z}) - \nabla F^*(\mathbf{w}), \mathbf{w} - \mathbf{u} \rangle \\ &\leq F^*(\mathbf{w}) + \langle \nabla F^*(\mathbf{w}), \mathbf{w} - \mathbf{u} \rangle + \|\nabla F^*(\mathbf{z}) - \nabla F^*(\mathbf{w})\| \|\mathbf{w} - \mathbf{u}\|_* \\ &\leq F^*(\mathbf{w}) + \langle \nabla F^*(\mathbf{w}), \mathbf{w} - \mathbf{u} \rangle + \frac{1}{\beta} \|\mathbf{z} - \mathbf{w}\|_* \|\mathbf{w} - \mathbf{u}\|_* \\ &\leq F^*(\mathbf{w}) + \langle \nabla F^*(\mathbf{w}), \mathbf{w} - \mathbf{u} \rangle + \frac{1}{\beta} \|\mathbf{w} - \mathbf{u}\|_*^2\end{aligned}$$

Which concludes the proof. □

The proof of Lemma 1 yields the following useful result that characterizes the smoothness properties of the dual function in a regularized LP:

### B.1 Proof of Lemma 2

**Lemma 2.** *Consider the regularized LP RegLP with  $\mathbf{r} \in \mathbb{R}^n$ ,  $\mathbf{E} \in \mathbb{R}^{m \times n}$ ,  $\mathbf{b} \in \mathbb{R}^m$ , and where  $F$  is  $\beta$ -strongly convex w.r.t. norm  $\|\cdot\|$ . The dual function  $g_D : \mathbb{R}^m \rightarrow \mathbb{R}$  of this regularized LP is  $\frac{\|\mathbf{E}\|_{*,*}^2}{\beta}$ -smooth w.r.t. to the dual norm  $\|\cdot\|_*$ , where we use  $\|\mathbf{E}\|_{*,*}$  to denote the  $\|\cdot\|$  norm over the  $\|\cdot\|_*$  norm of  $\mathbf{E}'$ 's rows.*

*Proof.* Recall that:

$$g_D(v) = \langle v, b \rangle + F^*(r - v^\top E).$$

Notice that:

$$\nabla_v g_D(v) = b + E \nabla F^*(r - v^\top E).$$

And therefore for any two  $v_1, v_2$ :

$$\begin{aligned} \|\nabla g_D(v_1) - \nabla g_D(v_2)\| &= \|E (\nabla F^*(r - v_1^\top E) - \nabla F^*(r - v_2^\top E))\| \\ &\stackrel{(i)}{\leq} \|E\|_{*,*} \|\nabla F^*(r - v_1^\top E) - \nabla F^*(r - v_2^\top E)\| \\ &\stackrel{(ii)}{\leq} \|E\|_{*,*} \frac{1}{\beta} \|v_1^\top E - v_2^\top E\|_* \\ &\stackrel{(ii)}{\leq} \frac{\|E\|_{*,*}^2}{\beta} \|v_1 - v_2\|_* \end{aligned}$$

The result follows. □

We can apply Lemma 2 to problem **PrimalReg- $\lambda$**  and thus characterize the smoothness properties of the dual function  $J_D$ .

## B.2 Proof of Lemma 3

**Lemma 3.** *The dual function  $J_D(\mathbf{v})$  is  $(|\mathcal{S}| + 1)\eta$ -smooth in the  $\|\cdot\|_\infty$  norm.*

*Proof.* Recall that **PrimalReg- $\lambda$**  can be written as **RegLP**:

$$\begin{aligned} \max_{\lambda \in \mathcal{D}} \langle \mathbf{r}, \lambda \rangle - F(\lambda) \\ \text{s.t. } \mathbf{E}\lambda = b. \end{aligned}$$

Where the regularizer  $(F(\lambda) := \frac{1}{\eta} \sum_{s,a} \lambda_{s,a} \left( \log \left( \frac{\lambda_{s,a}}{\mathbf{q}_{s,a}} \right) - 1 \right))$  is  $\frac{1}{\eta} - \|\cdot\|_1$  strongly convex. In this problem  $\mathbf{r}$  corresponds to the reward vector, the vector  $\mathbf{b} = (1 - \gamma)\boldsymbol{\mu} \in \mathbb{R}^{|\mathcal{S}|}$  and matrix  $\mathbf{E} \in \mathbb{R}^{|\mathcal{S}| \times |\mathcal{S}| \times |\mathcal{A}|}$  takes the form:

$$\mathbf{E}[s, s', a] = \begin{cases} \gamma \mathbf{P}_a(s|s') & \text{if } s \neq s' \\ 1 - \gamma \mathbf{P}_a(s|s) & \text{o.w.} \end{cases}$$

Therefore

$$\|\mathbf{E}\|_{1,\infty} \leq S + 1$$

The result follows as a corollary of Lemma 1. □

## C Proof of Lemma 4

The objective of this section is to show that a candidate dual variable  $\tilde{\mathbf{v}}$  having small gradient gives rise to a policy whose true visitation distribution has large primal value  $J_P$ .

**Lemma 4.** *Let  $\tilde{\mathbf{v}} \in \mathbb{R}^{|\mathcal{S}|}$  be arbitrary and let  $\tilde{\lambda}$  be its corresponding candidate primal variable. If  $\|\nabla_{\mathbf{v}} J_D(\tilde{\mathbf{v}})\|_1 \leq \epsilon$  and Assumptions 2 and 3 hold then whenever  $|\mathcal{S}| \geq 2$ :*

$$J_P(\lambda^{\tilde{\pi}}) \geq J_P(\lambda_\eta^*) - \epsilon \left( \frac{1+c}{1-\gamma} + \|\tilde{\mathbf{v}}\|_\infty \right),$$

where  $c = \frac{1 + \log(\frac{1}{\rho^{\frac{1}{\beta}}})}{\eta}$  and  $\lambda_\eta^*$  is the  $J_P$  optimum.

*Proof.* For any  $\lambda$  and  $\mathbf{v}$  let the lagrangian  $J_L(\lambda, \mathbf{v})$  be defined as,

$$J_L(\lambda, \mathbf{v}) = (1 - \gamma)\langle \mu, \mathbf{v} \rangle + \left\langle \lambda, \mathbf{A}^{\mathbf{v}} - \frac{1}{\eta} \left( \log \left( \frac{\lambda}{\mathbf{q}} \right) - 1 \right) \right\rangle$$

Note that  $J_D(\tilde{\mathbf{v}}) = J_L(\tilde{\lambda}, \tilde{\mathbf{v}})$  and that in fact  $J_L$  is linear in  $\tilde{\mathbf{v}}$ ; *i.e.*,

$$J_L(\tilde{\lambda}, \tilde{\mathbf{v}}) = J_L(\tilde{\lambda}, \tilde{\mathbf{v}}) + \langle \nabla_{\mathbf{v}} J_L(\tilde{\lambda}, \tilde{\mathbf{v}}), \tilde{\mathbf{v}} - \tilde{\mathbf{v}} \rangle.$$

Using Holder's inequality we have:

$$J_L(\tilde{\lambda}, \tilde{\mathbf{v}}) \geq J_L(\tilde{\lambda}, \tilde{\mathbf{v}}) - \|\nabla_{\mathbf{v}} J_L(\tilde{\lambda}, \tilde{\mathbf{v}})\|_1 \cdot \|\tilde{\mathbf{v}} - \tilde{\mathbf{v}}\|_{\infty} = J_D(\tilde{\mathbf{v}}) - \|\nabla_{\mathbf{v}} J_L(\tilde{\lambda}, \tilde{\mathbf{v}})\|_1 \cdot \|\tilde{\mathbf{v}} - \tilde{\mathbf{v}}\|_{\infty}.$$

Let  $\lambda_*$  be the candidate primal solution to the optimal dual solution  $\mathbf{v}_* = \arg \min_{\mathbf{v}} J_D(\mathbf{v})$ . By weak duality we have that  $J_D(\tilde{\mathbf{v}}) \geq J_P(\lambda^*) = J_D(\mathbf{v}_*)$ , and since by assumption  $\|\nabla_{\mathbf{v}} J_L(\tilde{\lambda}, \tilde{\mathbf{v}})\|_1 \leq \epsilon$ :

$$J_L(\tilde{\lambda}, \tilde{\mathbf{v}}) \geq J_P(\lambda^*) - \epsilon \|\tilde{\mathbf{v}} - \tilde{\mathbf{v}}\|_{\infty}. \quad (9)$$

In order to use this inequality to lower bound the value of  $J_P(\lambda^{\tilde{\pi}})$ , we will need to choose an appropriate  $\tilde{\mathbf{v}}$  such that the LHS reduces to  $J_P(\lambda^{\tilde{\pi}})$  while keeping the  $\ell_{\infty}$  norm on the RHS small. Thus we consider setting  $\tilde{\mathbf{v}}$  as:

$$\tilde{\mathbf{v}}_s = \mathbb{E}_{a, s' \sim \tilde{\pi} \times \mathcal{T}} \left[ \mathbf{z}_s + \mathbf{r}_{s,a} - \frac{1}{\eta} \left( \log \left( \frac{\lambda_{s,a}^{\tilde{\pi}}}{\mathbf{q}_{s,a}} \right) - 1 \right) + \gamma \tilde{\mathbf{v}}_{s'} \right]$$

Where  $\mathbf{z} \in \mathbb{R}^{|\mathcal{S}|}$  is some function to be determined later. It is clear that an appropriate  $\mathbf{z}$  exists as long as  $\mathbf{z}, \mathbf{r}, \frac{1}{\eta} \left( \log \left( \frac{\lambda_{s,a}^{\tilde{\pi}}}{\mathbf{q}_{s,a}} \right) - 1 \right)$  are uniformly bounded. Furthermore:

$$\|\tilde{\mathbf{v}}\|_{\infty} \leq \frac{\max_{s,a} \left| \mathbf{z}_s + \mathbf{r}_{s,a} - \frac{1}{\eta} \left( \log \left( \frac{\lambda_{s,a}^{\tilde{\pi}}}{\mathbf{q}_{s,a}} \right) - 1 \right) \right|}{1 - \gamma} \leq \frac{\|\mathbf{z}\|_{\infty} + \|\mathbf{r}\|_{\infty} + \frac{1}{\eta} \left\| \log \left( \frac{\lambda_{s,a}^{\tilde{\pi}}}{\mathbf{q}_{s,a}} \right) - 1 \right\|_{\infty}}{1 - \gamma} \quad (10)$$

Notice that by Assumptions [2](#) and [3](#), we have that  $\rho, \beta \leq \frac{1}{2}$ . This is because for all  $\pi$ , Assumption [3](#) implies that:

$$0 \leq 2\rho \leq |\mathcal{S}| \rho \leq \sum_s \lambda_s^{\pi} = 1$$

The proof for  $\beta \leq \frac{1}{2}$  is symmetric. Due to Assumption [2](#) the  $\|\cdot\|_{\infty}$  norm of  $\log \left( \frac{\lambda^{\tilde{\pi}}}{\mathbf{q}} \right) - \mathbf{1}_{|\mathcal{S}||\mathcal{A}|}$  satisfies:

$$\left\| \log \left( \frac{\lambda^{\tilde{\pi}}}{\mathbf{q}} \right) - \mathbf{1}_{|\mathcal{S}||\mathcal{A}|} \right\|_{\infty} \leq 1 + \left\| \log \left( \frac{\lambda^{\tilde{\pi}}}{\mathbf{q}} \right) \right\|_{\infty} \leq 1 + \max(|\log(\rho/\beta)|, \log(1/\beta)) \leq 1 + \log(1/\rho) + \log(1/\beta).$$

Notice the following relationships hold:

$$\begin{aligned} \left\langle \tilde{\lambda}, \mathbf{A}^{\tilde{\mathbf{v}}} - \frac{1}{\eta} \left( \log \left( \frac{\tilde{\lambda}}{\mathbf{q}} \right) - 1 \right) \right\rangle &= \sum_s \tilde{\lambda}_s \left( \mathbb{E}_{a, s' \sim \tilde{\pi} \times \mathcal{P}} \left[ \mathbf{r}_{s,a} + \gamma \tilde{\mathbf{v}}_{s'} - \tilde{\mathbf{v}}_s - \frac{1}{\eta} \left( \log \left( \frac{\tilde{\lambda}_{s,a}}{\mathbf{q}_{s,a}} \right) - 1 \right) \right] \right) \\ &= \sum_s \tilde{\lambda}_s \left( \mathbb{E}_{a, s' \sim \tilde{\pi} \times \mathcal{P}} \left[ \frac{1}{\eta} \left( \log \left( \frac{\lambda_{s,a}^{\tilde{\pi}}}{\mathbf{q}_{s,a}} \right) - 1 \right) - \frac{1}{\eta} \left( \log \left( \frac{\tilde{\lambda}_{s,a}}{\mathbf{q}_{s,a}} \right) - 1 \right) - \mathbf{z}_s \right] \right) \\ &= \sum_s \tilde{\lambda}_s \left( \mathbb{E}_{a, s' \sim \tilde{\pi} \times \mathcal{P}} \left[ \frac{1}{\eta} \log \left( \lambda_{s,a}^{\tilde{\pi}} \right) - \frac{1}{\eta} \log \left( \tilde{\lambda}_{s,a} \right) - \mathbf{z}_s \right] \right) \\ &= \sum_s \tilde{\lambda}_s \left( \frac{1}{\eta} \log \left( \lambda_s^{\tilde{\pi}} \right) - \frac{1}{\eta} \log \left( \tilde{\lambda}_s \right) - \mathbf{z}_s \right) \end{aligned} \quad (11)$$

Where  $\tilde{\lambda}_s = \sum_a \tilde{\lambda}_{s,a}$  and  $\lambda_s^\pi = \sum_a \lambda_{s,a}^\pi$ . Note that by definition:

$$(1 - \gamma)\langle \boldsymbol{\mu}, \bar{\mathbf{v}} \rangle = \left\langle \boldsymbol{\lambda}^\pi, \mathbf{z} + \mathbf{r} - \frac{1}{\eta} \left( \log \left( \frac{\boldsymbol{\lambda}^\pi}{\mathbf{q}} \right) - 1 \right) \right\rangle = J_P(\boldsymbol{\lambda}^\pi) + \langle \boldsymbol{\lambda}^\pi, \mathbf{z} \rangle. \quad (12)$$

Let's expand the definition of  $J_L(\tilde{\boldsymbol{\lambda}}, \bar{\mathbf{v}})$  using Equations [11](#) and [12](#):

$$\begin{aligned} J_L(\tilde{\boldsymbol{\lambda}}, \bar{\mathbf{v}}) &= (1 - \gamma)\langle \boldsymbol{\mu}, \bar{\mathbf{v}} \rangle + \left\langle \tilde{\boldsymbol{\lambda}}, \mathbf{A} \bar{\mathbf{v}} - \frac{1}{\eta} \left( \log \left( \frac{\tilde{\boldsymbol{\lambda}}}{\mathbf{q}} \right) - 1 \right) \right\rangle \\ &= J_P(\boldsymbol{\lambda}^\pi) + \langle \boldsymbol{\lambda}^\pi, \mathbf{z} \rangle + \sum_s \tilde{\lambda}_s \left( \frac{1}{\eta} \log(\boldsymbol{\lambda}_s^\pi) - \frac{1}{\eta} \log(\tilde{\lambda}_s) - \mathbf{z}_s \right) \\ &= J_P(\boldsymbol{\lambda}^\pi) + \sum_s \left( \mathbf{z}_s (\boldsymbol{\lambda}_s^\pi - \tilde{\lambda}_s) + \frac{1}{\eta} \tilde{\lambda}_s \log \left( \frac{\boldsymbol{\lambda}_s^\pi}{\tilde{\lambda}_s} \right) \right) \end{aligned}$$

Since we want this expression to equal  $J_P(\boldsymbol{\lambda}^\pi)$ , we need to choose  $\mathbf{z}$  such that:

$$\mathbf{z}_s = \frac{\frac{1}{\eta} \log \left( \frac{\boldsymbol{\lambda}_s^\pi}{\tilde{\lambda}_s} \right)}{1 - \frac{\boldsymbol{\lambda}_s^\pi}{\tilde{\lambda}_s}}.$$

By Assumption [3](#) we have that for all  $s$ :

$$\frac{\boldsymbol{\lambda}_s^\pi}{\tilde{\lambda}_s} \geq \rho$$

Now we bound  $\|\mathbf{z}_s\|_\infty$ . Note that the function  $h(\phi) = \frac{\log \phi}{1 - \phi}$  is non decreasing and negative, and therefore the maximum of its absolute value is achieved at the lower end of its domain. This implies:

$$|\mathbf{z}_s| \leq \frac{|h(\rho)|}{\eta} = \frac{|\log(\rho)|}{\eta(1 - \rho)} \leq \frac{2 \log(1/\rho)}{\eta}, \quad \forall s \in \mathcal{S}.$$

And therefore Equation [10](#) implies:

$$\|\bar{\mathbf{v}}\|_\infty \leq \frac{\frac{2 \log(1/\rho)}{\eta} + 1 + \frac{1 + \log(1/\rho) + \log(1/\beta)}{\eta}}{1 - \gamma} = \frac{1 + \frac{1 + \log(\frac{1}{\rho^3 \beta})}{\eta}}{1 - \gamma}$$

Putting these together we obtain the following version of equation [9](#):

$$J_L(\tilde{\boldsymbol{\lambda}}, \bar{\mathbf{v}}) \geq J_P(\boldsymbol{\lambda}^*) - \epsilon \left( \frac{1 + \frac{1 + \log(\frac{1}{\rho^3 \beta})}{\eta}}{1 - \gamma} + \|\bar{\mathbf{v}}\|_\infty \right)$$

As desired. □

## D Proof of Lemma [5](#)

In this section we derive an upper bound for the  $l_\infty$  norm of the optimal solution  $\mathbf{v}^*$ .

**Lemma 5.** Under Assumptions [1](#), [2](#) and [3](#) the optimal dual variables are bounded as

$$\|\mathbf{v}^*\|_\infty \leq \frac{1}{1 - \gamma} \left( 1 + \frac{\log \frac{|S||A|}{\beta \rho}}{\eta} \right) =: D. \quad (7)$$

*Proof.* Recall the Lagrangian form,

$$\min_{\mathbf{v}} \max_{\boldsymbol{\lambda}_{s,a} \in \Delta_{S \times A}} J_L(\boldsymbol{\lambda}, \mathbf{v}) := (1 - \gamma)\langle \mathbf{v}, \boldsymbol{\mu} \rangle + \left\langle \boldsymbol{\lambda}, \mathbf{A} \mathbf{v} - \frac{1}{\eta} \left( \log \left( \frac{\boldsymbol{\lambda}_{s,a}}{\mathbf{q}_{s,a}} \right) - 1 \right) \right\rangle.$$

The KKT conditions of  $\lambda^*, \mathbf{v}^*$  imply that for any  $s, a$ , either (1)  $\lambda_{s,a}^* = 0$  and  $\frac{\partial}{\partial \lambda_{s,a}} J_L(\lambda^*, v^*) \leq 0$  or (2)  $\frac{\partial}{\partial \lambda_{s,a}} J_L(\lambda^*, v^*) = 0$ . The partial derivative of  $J_L$  is given by,

$$\frac{\partial}{\partial \lambda_{s,a}} J_L(\lambda^*, \mathbf{v}^*) = \mathbf{r}_{s,a} - \frac{1}{\eta} \log \left( \frac{\lambda_{s,a}^*}{\mathbf{q}_{s,a}} \right) + \gamma \sum_{s'} P_a(s'|s) \mathbf{v}_{s'}^* - \mathbf{v}_s^*. \quad (13)$$

Thus, for any  $s, a$ , either

$$\lambda_{s,a}^* = 0 \text{ and } \mathbf{v}_s^* \geq \mathbf{r}_{s,a} - \frac{1}{\eta} \log \left( \frac{\lambda_{s,a}^*}{\mathbf{q}_{s,a}} \right) + \gamma \sum_{s'} P_a(s'|s) \mathbf{v}_{s'}^*, \quad (14)$$

or,

$$\lambda_{s,a}^* > 0 \text{ and } \mathbf{v}_s^* = \mathbf{r}_{s,a} - \frac{1}{\eta} \log \left( \frac{\lambda_{s,a}^*}{\mathbf{q}_{s,a}} \right) + \gamma \sum_{s'} P_a(s'|s) \mathbf{v}_{s'}^*. \quad (15)$$

Recall that  $\lambda^*$  is the discounted state-action visitations of some policy  $\pi_*$ ; i.e.,  $\lambda_{s,a}^* = \lambda_s^{\pi_*} \cdot \pi_*(a|s)$  for some  $\pi_*$ . Note that by Assumption 3 any policy  $\pi$  has  $\lambda_s^{\pi_*} > 0$  for all  $s$ . Accordingly, the KKT conditions imply,

$$\pi_*(a|s) = 0 \text{ and } \mathbf{v}_s^* \geq \mathbf{r}_{s,a} - \frac{1}{\eta} \log \left( \frac{\lambda_{s,a}^*}{\mathbf{q}_{s,a}} \right) + \gamma \sum_{s'} P_a(s'|s) \mathbf{v}_{s'}^*, \quad (16)$$

or,

$$\pi_*(a|s) > 0 \text{ and } \mathbf{v}_s^* = \mathbf{r}_{s,a} - \frac{1}{\eta} \log \left( \frac{\lambda_{s,a}^*}{\mathbf{q}_{s,a}} \right) + \gamma \sum_{s'} P_a(s'|s) \mathbf{v}_{s'}^*. \quad (17)$$

Equivalently,

$$\mathbf{v}_s^* = \mathbb{E}_{a \sim \pi_*(s)} \left[ \mathbf{r}_{s,a} - \frac{1}{\eta} \log \left( \frac{\lambda_{s,a}^*}{\mathbf{q}_{s,a}} \right) + \gamma \sum_{s'} P_a(s'|s) \mathbf{v}_{s'}^* \right] \quad (18)$$

$$= \frac{1}{\eta} \mathbb{E}_{a \sim \pi_*(s)} \left[ -\log \left( \frac{\pi(a|s)}{\mathbf{q}_{a|s}} \right) \right] + \mathbb{E}_{a \sim \pi_*(s)} \left[ \mathbf{r}_{s,a} - \frac{1}{\eta} \log \left( \frac{\lambda_s^{\pi_*}}{\mathbf{q}_s} \right) + \gamma \sum_{s'} P_a(s'|s) \mathbf{v}_{s'}^* \right]. \quad (19)$$

We may express these conditions as a Bellman recurrence for  $\mathbf{v}_s^*$ :

$$\mathbf{v}_s^* = \frac{1}{\eta} \mathbb{E}_{a \sim \pi_*(s)} \left[ -\log \left( \frac{\pi(a|s)}{\mathbf{q}_{a|s}} \right) \right] + \mathbb{E}_{a \sim \pi_*(s)} \left[ \mathbf{r}_{s,a} - \frac{1}{\eta} \log \left( \frac{\lambda_s^{\pi_*}}{\mathbf{q}_s} \right) + \gamma \sum_{s'} P_a(s'|s) \mathbf{v}_{s'}^* \right]. \quad (20)$$

The solution to these Bellman equations is bounded when  $\mathbb{E}_{a \sim \pi_*(s)} \left[ -\log \left( \frac{\pi(a|s)}{\mathbf{q}_{a|s}} \right) \right]$ ,  $\mathbf{r}_{s,a}$ , and  $\log \left( \frac{\lambda_s^{\pi_*}}{\mathbf{q}_s} \right)$  are bounded [24]. And indeed, by Assumptions 3 and 1 each of these is bounded by within  $[\log \beta, \log |A|]$ ,  $[0, 1]$ , and  $[\log \rho, -\log \beta]$ , respectively. We may thus bound the solution as,

$$\|\mathbf{v}^*\|_\infty \leq \frac{1}{1-\gamma} \left( 1 + \frac{\log \frac{|S||A|}{\beta\rho}}{\eta} \right). \quad (21)$$

□

## E Convergence rates for REPS

We start with the proof of Lemma 6 which we restate for convenience:

**Lemma 11.** *If  $\mathbf{x}$  is an  $\epsilon$ -optimal solution for the  $\alpha$ -smooth function  $h : \mathbb{R}^d \rightarrow \mathbb{R}$  w.r.t. norm  $\|\cdot\|_*$  then the gradient of  $h$  at  $\mathbf{x}$  satisfies:*

$$\|\nabla h(\mathbf{x})\| \leq \sqrt{2\alpha\epsilon}.$$

*Proof.* Let  $\mathbf{x} \in \mathbb{R}^d$  be an arbitrary point and let  $\mathbf{x}'$  equal the point resulting of the update

$$\mathbf{x}' = \arg \min_{\mathbf{y} \in \mathcal{D}} \frac{1}{\alpha} \langle \nabla h(\mathbf{x}), \mathbf{y} - \mathbf{x} \rangle + \frac{\|\mathbf{y} - \mathbf{x}\|_*^2}{2} \quad (22)$$

Notice that by smoothness of  $h$ :

$$h(\mathbf{x}') \leq h(\mathbf{x}) + \langle \nabla h(\mathbf{x}), \mathbf{x}' - \mathbf{x} \rangle + \frac{\alpha}{2} \|\mathbf{x}' - \mathbf{x}\|_*^2 = h(\mathbf{x}) - \frac{1}{2\alpha} \|\nabla h(\mathbf{x})\|^2 \quad (23)$$

Since  $h(\mathbf{x}^*) \leq h(\mathbf{x}')$  and  $\mathbf{x}$  is  $\epsilon$ -optimal:

$$\frac{1}{2\alpha} \|\nabla h(\mathbf{x})\|^2 + h(\mathbf{x}^*) \stackrel{(i)}{\leq} \frac{1}{2\alpha} \|\nabla h(\mathbf{x})\|^2 + h(\mathbf{x}') \stackrel{(ii)}{\leq} h(\mathbf{x}) \stackrel{(iii)}{\leq} h(\mathbf{x}^*) + \epsilon$$

Inequality (i) holds because  $h(\mathbf{x}^*) \leq h(\mathbf{x}')$ , inequality (ii) by Equation 23 and (iii) by  $\epsilon$ -optimality of  $\mathbf{x}$ . Therefore:

$$\frac{1}{2\alpha} \|\nabla h(\mathbf{x})\|^2 \leq \epsilon.$$

The result follows.  $\square$

We also show that the gradient norm of a smooth function over a bounded domain containing the optimum can be bounded:

**Lemma 12.** *If  $h$  is an  $\alpha$ -smooth function w.r.t. norm  $\|\cdot\|_*$ , and  $\mathbf{x}^*$  is such that  $\nabla h(\mathbf{x}^*) = \mathbf{0}$  then:*

$$\|\nabla h(\mathbf{x})\| \leq \alpha \|\mathbf{x} - \mathbf{x}^*\|_*.$$

And therefore whenever  $\|\mathbf{x} - \mathbf{x}^*\|_* \leq D$  we have that:

$$\|\nabla h(\mathbf{x})\| \leq \alpha D.$$

*Proof.* Since  $h$  is  $\alpha$ -smooth:

$$h(\mathbf{x}) \leq h(\mathbf{x}^*) + \langle \nabla h(\mathbf{x}^*), \mathbf{x} - \mathbf{x}^* \rangle + \frac{\alpha}{2} \|\mathbf{x} - \mathbf{x}^*\|_*^2 = h(\mathbf{x}^*) + \frac{\alpha}{2} \|\mathbf{x} - \mathbf{x}^*\|_*^2$$

Therefore:

$$h(\mathbf{x}) - h(\mathbf{x}^*) \leq \frac{\alpha}{2} \|\mathbf{x} - \mathbf{x}^*\|_*^2.$$

Therefore, as a consequence of Lemma 6:

$$\|\nabla h(\mathbf{x})\| \leq \alpha D.$$

The result follows.  $\square$

## E.1 Proof of Theorem 2

We can now prove the estimation guarantees whenever exact gradients are available.

**Theorem 4.** *For any  $\epsilon > 0$ , let  $\eta = \frac{1}{2\epsilon \log(\frac{|\mathcal{S}||\mathcal{A}|}{\beta})}$ . If  $T \geq (|\mathcal{S}| + 1)^{3/2} \frac{(2+c')^2}{(1-\gamma)^2 \epsilon^2}$ , then  $\pi_T$  is an  $\epsilon$ -optimal policy.*

*Proof.* As a consequence of Corollary 2 we can conclude that:

$$J_P(\boldsymbol{\lambda}^{\pi_T}) \geq J_P(\boldsymbol{\lambda}^{*,\eta}) - \frac{\epsilon}{2}.$$

Where  $\boldsymbol{\lambda}_\eta^*$  is the regularized optimum. Recall that:

$$J_P(\boldsymbol{\lambda}) = \sum_{s,a} \lambda_{s,a} \mathbf{r}_{s,a} - \frac{1}{\eta} \sum_{s,a} \lambda_{s,a} \left( \log \left( \frac{\lambda_{s,a}}{\mathbf{q}_{s,a}} \right) - 1 \right).$$



Since  $\lambda^{*,\eta}$  is the maximizer of the regularized objective, it satisfies  $J_P(\lambda^{*,\eta}) \geq J_P(\lambda^*)$  where  $\lambda^*$  is the visitation frequency of the optimal policy corresponding to the unregularized objective. We can conclude that:

$$\begin{aligned} \sum_{s,a} \lambda_{s,a}^{\pi_T} \mathbf{r}_{s,a} &\geq \sum_{s,a} \lambda_{s,a}^* \mathbf{r}_{s,a} + \frac{1}{\eta} \left( \sum_{s,a} \lambda_{s,a}^{\pi_T} \left( \log \left( \frac{\lambda_{s,a}^{\pi_T}}{\mathbf{q}_{s,a}} \right) - 1 \right) - \sum_{s,a} \lambda_{s,a}^* \left( \log \left( \frac{\lambda_{s,a}^*}{\mathbf{q}_{s,a}} \right) - 1 \right) \right) - \frac{\epsilon}{2} \\ &= \sum_{s,a} \lambda_{s,a}^* \mathbf{r}_{s,a} + \frac{1}{\eta} \left( \sum_{s,a} \lambda_{s,a}^{\pi_T} \left( \log \left( \frac{\lambda_{s,a}^{\pi_T}}{\mathbf{q}_{s,a}} \right) \right) - \sum_{s,a} \lambda_{s,a}^* \left( \log \left( \frac{\lambda_{s,a}^*}{\mathbf{q}_{s,a}} \right) \right) \right) - \frac{\epsilon}{2} \\ &\geq \sum_{s,a} \lambda_{s,a}^* \mathbf{r}_{s,a} - \frac{2}{\eta} \log \left( \frac{|\mathcal{S}||\mathcal{A}|}{\beta} \right) - \frac{\epsilon}{2} \end{aligned}$$

And therefore if  $\eta = \frac{1}{4\epsilon \log \left( \frac{|\mathcal{S}||\mathcal{A}|}{\beta} \right)}$ , we can conclude that:

$$\sum_{s,a} \lambda_{s,a}^{\pi_T} \mathbf{r}_{s,a} \geq \sum_{s,a} \lambda_{s,a}^* \mathbf{r}_{s,a} - \epsilon.$$

□

## F Accelerated Gradient Descent

---

### Algorithm 4 Accelerated Gradient Descent

---

**Input** Initial point  $\mathbf{x}_0$ , domain  $\mathcal{D}$ , distance generating function  $w$ .

$\mathbf{y}_0 \leftarrow \mathbf{x}_0$ ,  $\mathbf{z}_0 \leftarrow \mathbf{x}_0$ .

**for**  $t = 0, \dots, T$  **do**

$$\eta_{t+1} = \frac{t+2}{2\alpha} \text{ and } \tau_t = \frac{2}{t+2}.$$

$$\mathbf{x}_{t+1} \leftarrow (1 - \tau_t)\mathbf{y}_t + \tau_t\mathbf{z}_t$$

$$\mathbf{y}_{t+1} \leftarrow \arg \min_{\mathbf{y} \in \mathcal{D}} \frac{1}{\alpha} \langle \nabla h(\mathbf{x}_t), \mathbf{y} - \mathbf{x}_t \rangle + \frac{\|\mathbf{y} - \mathbf{x}_t\|_*^2}{2}.$$

$$\mathbf{z}_{t+1} \leftarrow \arg \min_{\mathbf{z} \in \mathcal{D}} \eta_t \langle \nabla h(\mathbf{x}_t), \mathbf{z} - \mathbf{z}_t \rangle + D_w(\mathbf{z}_t, \mathbf{z}).$$

**end**

For some stepsize parameter sequence  $\eta_t$ .

---

Algorithm 4 satisfies the following convergence guarantee:

## G Stochastic Gradient Descent

In this section we will have all the proofs and results corresponding to Section 6 in the main. We start by showing the proof of Lemma 9.

**Lemma 9.** *Let  $f : \mathbb{R}^d \rightarrow \mathbb{R}$  be an  $L$ -smooth function. We consider the following update:*

$$\mathbf{x}'_{t+1} = \mathbf{x}_t - \tau (\nabla f(\mathbf{x}_t) + \boldsymbol{\epsilon}_t + \mathbf{b}_t) ; \quad \mathbf{x}_{t+1} = \Pi_{\mathcal{D}}(\mathbf{x}'_{t+1}).$$

If  $\tau \leq \frac{2}{L}$  then:

$$\begin{aligned} f(\mathbf{x}_{t+1}) - f(\mathbf{x}_*) &\leq \frac{\|\mathbf{x}_t - \mathbf{x}_*\|^2 - \|\mathbf{x}_{t+1} - \mathbf{x}_*\|^2}{2\tau} + 2\tau \|\nabla f(\mathbf{x}_t)\|^2 + 5\tau \|\mathbf{b}_t\|^2 + 5\tau \|\boldsymbol{\epsilon}_t\|^2 \\ &\quad + \|\mathbf{b}_t\|_1 \|\mathbf{x}_t - \mathbf{x}_*\|_{\infty} - \langle \boldsymbol{\epsilon}_t, \mathbf{x}_t - \mathbf{x}_* \rangle. \end{aligned}$$

*Proof.* Through the proof we use the notation  $\|\cdot\|$  to denote the  $L_2$  norm. By smoothness the following holds:

$$f(\mathbf{x}_{t+1}) \leq f(\mathbf{x}_t) + \langle \nabla f(\mathbf{x}_t), \mathbf{x}_{t+1} - \mathbf{x}_t \rangle + \frac{L}{2} \|\mathbf{x}_{t+1} - \mathbf{x}_t\|_\infty^2 \leq f(\mathbf{x}_t) + \langle \nabla f(\mathbf{x}_t), \mathbf{x}_{t+1} - \mathbf{x}_t \rangle + \frac{L}{2} \|\mathbf{x}_{t+1} - \mathbf{x}_t\|^2$$

Since  $\mathbf{x}_{t+1} = \Pi_{\mathcal{D}}(\mathbf{x}'_{t+1})$  and by properties of a convex projection:

$$\langle \mathbf{x}'_{t+1} - \mathbf{x}_{t+1}, \mathbf{x}_t - \mathbf{x}_{t+1} \rangle \leq 0.$$

And therefore:

$$\langle \mathbf{x}_t - \tau(\nabla f(\mathbf{x}_t) + \mathbf{b}_t + \boldsymbol{\epsilon}_t) - \mathbf{x}_{t+1}, \mathbf{x}_t - \mathbf{x}_{t+1} \rangle \leq 0.$$

Which in turn implies that :

$$\|\mathbf{x}_t - \mathbf{x}_{t+1}\|^2 \leq \tau \langle \nabla f(\mathbf{x}_t) + \mathbf{b}_t + \boldsymbol{\epsilon}_t, \mathbf{x}_t - \mathbf{x}_{t+1} \rangle.$$

We can conclude that:

$$f(\mathbf{x}_{t+1}) \leq f(\mathbf{x}_t) - \frac{\|\mathbf{x}_t - \mathbf{x}_{t+1}\|^2}{\tau} + \langle \mathbf{b}_t + \boldsymbol{\epsilon}_t, \mathbf{x}_t - \mathbf{x}_{t+1} \rangle + \frac{L}{2} \|\mathbf{x}_{t+1} - \mathbf{x}_t\|^2. \quad (24)$$

By convexity:

$$f(\mathbf{x}_*) \geq f(\mathbf{x}_t) + \langle \nabla f(\mathbf{x}_t), \mathbf{x}_* - \mathbf{x}_t \rangle.$$

And therefore  $f(\mathbf{x}_t) \leq f(\mathbf{x}_*) + \langle \nabla f(\mathbf{x}_t), \mathbf{x}_t - \mathbf{x}_* \rangle$ .

Combining this last result with Equation [24](#):

$$f(\mathbf{x}_{t+1}) \leq f(\mathbf{x}_*) + \langle \nabla f(\mathbf{x}_t), \mathbf{x}_t - \mathbf{x}_* \rangle + \left( \frac{L}{2} - \frac{1}{\tau} \right) \|\mathbf{x}_{t+1} - \mathbf{x}_t\|^2 + \langle \mathbf{b}_t + \boldsymbol{\epsilon}_t, \mathbf{x}_t - \mathbf{x}_{t+1} \rangle. \quad (25)$$

Now observe that as a consequence of the contraction property of projections

$$\begin{aligned} \|\mathbf{x}_{t+1} - \mathbf{x}_*\|^2 &\leq \|\mathbf{x}_t - \tau(\nabla f(\mathbf{x}_t) + \mathbf{b}_t + \boldsymbol{\epsilon}_t) - \mathbf{x}_*\|^2 \\ &= \|\mathbf{x}_t - \mathbf{x}_*\|^2 + \tau^2 \|\nabla f(\mathbf{x}_t) + \mathbf{b}_t + \boldsymbol{\epsilon}_t\|^2 - 2\tau \langle \nabla f(\mathbf{x}_t) + \mathbf{b}_t + \boldsymbol{\epsilon}_t, \mathbf{x}_t - \mathbf{x}_* \rangle. \end{aligned}$$

And therefore:

$$\langle \nabla f(\mathbf{x}_t), \mathbf{x}_t - \mathbf{x}_* \rangle \leq \frac{\|\mathbf{x}_t - \mathbf{x}_*\|^2 - \|\mathbf{x}_{t+1} - \mathbf{x}_*\|^2}{2\tau} + \frac{\tau}{2} \|\nabla f(\mathbf{x}_t) + \mathbf{b}_t + \boldsymbol{\epsilon}_t\|^2 - \langle \mathbf{b}_t + \boldsymbol{\epsilon}_t, \mathbf{x}_t - \mathbf{x}_* \rangle.$$

Substituting this last inequality into Equation [25](#):

$$f(\mathbf{x}_{t+1}) - f(\mathbf{x}_*) \leq \frac{\|\mathbf{x}_t - \mathbf{x}_*\|^2 - \|\mathbf{x}_{t+1} - \mathbf{x}_*\|^2}{2\tau} + \frac{\tau}{2} \|\nabla f(\mathbf{x}_t) + \mathbf{b}_t + \boldsymbol{\epsilon}_t\|^2 - \langle \mathbf{b}_t + \boldsymbol{\epsilon}_t, \mathbf{x}_t - \mathbf{x}_* \rangle + \quad (26)$$

$$\left( \frac{L}{2} - \frac{1}{\tau} \right) \|\mathbf{x}_{t+1} - \mathbf{x}_t\|^2 + \langle \mathbf{b}_t + \boldsymbol{\epsilon}_t, \mathbf{x}_t - \mathbf{x}_{t+1} \rangle \quad (27)$$

Notice that as a consequence of the contraction property of projections:

$$\begin{aligned}\|\mathbf{x}_{t+1} - \mathbf{x}_t\|^2 &\leq \|\mathbf{x}_t - \tau(\nabla f(\mathbf{x}_t) + \mathbf{b}_t + \boldsymbol{\epsilon}_t) - \mathbf{x}_t\|^2 \\ &= \tau\|\nabla f(\mathbf{x}_t) + \mathbf{b}_t + \boldsymbol{\epsilon}_t\|^2\end{aligned}$$

And therefore

$$\langle \mathbf{b}_t + \boldsymbol{\epsilon}_t, \mathbf{x}_t - \mathbf{x}_{t+1} \rangle \leq \|\mathbf{b}_t + \boldsymbol{\epsilon}_t\| \|\mathbf{x}_t - \mathbf{x}_{t+1}\| \leq \tau \|\mathbf{b}_t + \boldsymbol{\epsilon}_t\| \|\nabla f(\mathbf{x}_t) + \mathbf{b}_t + \boldsymbol{\epsilon}_t\|$$

:

Substituting this back into [27](#) and assuming  $\frac{L}{2} \leq \frac{1}{\tau}$ :

$$\begin{aligned}f(\mathbf{x}_{t+1}) - f(\mathbf{x}_*) &\leq \frac{\|\mathbf{x}_t - \mathbf{x}_*\|^2 - \|\mathbf{x}_{t+1} - \mathbf{x}_*\|^2}{2\tau} + \frac{\tau}{2} \|\nabla f(\mathbf{x}_t) + \mathbf{b}_t + \boldsymbol{\epsilon}_t\|^2 - \langle \mathbf{b}_t + \boldsymbol{\epsilon}_t, \mathbf{x}_t - \mathbf{x}_* \rangle + \\ &\quad \tau \|\mathbf{b}_t + \boldsymbol{\epsilon}_t\| \|\nabla f(\mathbf{x}_t) + \mathbf{b}_t + \boldsymbol{\epsilon}_t\| \\ &\leq \frac{\|\mathbf{x}_t - \mathbf{x}_*\|^2 - \|\mathbf{x}_{t+1} - \mathbf{x}_*\|^2}{2\tau} + \tau \|\nabla f(\mathbf{x}_t) + \mathbf{b}_t + \boldsymbol{\epsilon}_t\|^2 + \frac{\tau}{2} \|\mathbf{b}_t + \boldsymbol{\epsilon}_t\|^2 - \langle \mathbf{b}_t + \boldsymbol{\epsilon}_t, \mathbf{x}_t - \mathbf{x}_* \rangle \\ &\stackrel{(i)}{\leq} \frac{\|\mathbf{x}_t - \mathbf{x}_*\|^2 - \|\mathbf{x}_{t+1} - \mathbf{x}_*\|^2}{2\tau} + 2\tau \|\nabla f(\mathbf{x}_t)\|^2 + 5\tau \|\mathbf{b}_t\|^2 + 5\tau \|\boldsymbol{\epsilon}_t\|^2 - \langle \mathbf{b}_t + \boldsymbol{\epsilon}_t, \mathbf{x}_t - \mathbf{x}_* \rangle \\ &\leq \frac{\|\mathbf{x}_t - \mathbf{x}_*\|^2 - \|\mathbf{x}_{t+1} - \mathbf{x}_*\|^2}{2\tau} + 2\tau \|\nabla f(\mathbf{x}_t)\|^2 + 5\tau \|\mathbf{b}_t\|^2 + 5\tau \|\boldsymbol{\epsilon}_t\|^2 + \|\mathbf{b}_t\|_1 \|\mathbf{x}_t - \mathbf{x}_*\|_\infty - \langle \boldsymbol{\epsilon}_t, \mathbf{x}_t - \mathbf{x}_* \rangle\end{aligned}$$

Inequality (i) is a result of a repeated use of Young's inequality. The last inequality is a result of Cauchy-Schwartz.

□

## H Stochastic Gradients Analysis

We will make use of the following concentration inequality:

**Lemma 13** (Uniform empirical Bernstein bound). *In the terminology of Howard et al. [\[16\]](#), let  $S_t = \sum_{i=1}^t Y_i$  be a sub- $\psi_P$  process with parameter  $c > 0$  and variance process  $W_t$ . Then with probability at least  $1 - \delta$  for all  $t \in \mathbb{N}$*

$$\begin{aligned}S_t &\leq 1.44 \sqrt{(W_t \vee m) \left( 1.4 \ln \ln \left( 2 \left( \frac{W_t}{m} \vee 1 \right) \right) + \ln \frac{5.2}{\delta} \right)} \\ &\quad + 0.41c \left( 1.4 \ln \ln \left( 2 \left( \frac{W_t}{m} \vee 1 \right) \right) + \ln \frac{5.2}{\delta} \right)\end{aligned}$$

where  $m > 0$  is arbitrary but fixed.

*Proof.* Setting  $s = 1.4$  and  $\eta = 2$  in the polynomial stitched boundary in Equation (10) of Howard et al. [\[16\]](#) shows that  $u_{c,\delta}(v)$  is a sub- $\psi_G$  boundary for constant  $c$  and level  $\delta$  where

$$\begin{aligned}u_{c,\delta}(v) &= 1.44 \sqrt{(v \vee 1) \left( 1.4 \ln \ln (2(v \vee 1)) + \ln \frac{5.2}{\delta} \right)} \\ &\quad + 1.21c \left( 1.4 \ln \ln (2(v \vee 1)) + \ln \frac{5.2}{\delta} \right).\end{aligned}$$

By the boundary conversions in Table 1 in Howard et al. [\[16\]](#)  $u_{c/3,\delta}$  is also a sub- $\psi_P$  boundary for constant  $c$  and level  $\delta$ . The desired bound then follows from Theorem 1 by Howard et al. [\[16\]](#). □

The following estimation bound holds:

**Lemma 14.** Let  $\{(s_\ell, a_\ell, s'_\ell)\}_{\ell=1}^\infty$  be samples generated as above. Let  $N_t(s, a) = \sum_{\ell=1}^t \mathbf{1}(s_\ell, a_\ell = s, a)$ . Let  $\delta \in (0, 1)$ . With probability at least  $1 - (2|S||\mathcal{A}|\delta)$  for all  $t$  such that  $\ln(2t) + \ln \frac{5.2}{\delta} \leq \frac{t\beta}{6}$  and for all  $s, a \in \mathcal{S} \times \mathcal{A}$  simultaneously:

$$N_t(s, a) \in \left[ \frac{t\mathbf{q}_{s,a}}{4}, \frac{7t\mathbf{q}_{s,a}}{4} \right]$$

Additionally define  $\widehat{\mathbf{q}}_{s,a} = \frac{N_t(s,a)}{t}$ . For any  $\epsilon \in (0, 1)$  with probability at least  $1 - (2|S||\mathcal{A}|\delta)$  and for all  $t$  such that  $\frac{t}{\ln \ln(2t)} \geq \frac{1 + \ln \frac{5.2}{\delta}}{\beta\epsilon^2}$ :

$$|\widehat{\mathbf{q}}_{s,a} - \mathbf{q}_{s,a}| \leq 3.69\epsilon\mathbf{q}_{s,a}.$$

*Proof.* We start by producing a lower bound for  $N_t(s, a)$ . Consider the martingale sequence  $Z_{s,a}(\ell) = \mathbf{1}(s_\ell = s, a_\ell = a) - \mathbf{q}_{s,a}$  with the variance process  $V_t = \sum_{\ell=1}^t \mathbb{E}[Z_{s,a}^2(\ell) | \mathcal{F}_{\ell-1}]$  satisfying  $\mathbb{E}[Z_{s,a}^2(\ell) | \mathcal{F}_{\ell-1}] \leq \mathbf{q}_{s,a}$ . The martingale process  $Z_{s,a}(\ell)$  satisfies the sub- $\psi_P$  condition of [16] with constant  $c = 1$  (see Bennet case in Table 3 of [16]). By Lemma 13, and setting  $m = \mathbf{q}_{s,a}$  we conclude that with probability at least  $1 - \delta$  for all  $t \in \mathbb{N}$ :

$$\begin{aligned} N_t(s, a) &\geq t\mathbf{q}_{s,a} - 1.44\sqrt{\mathbf{q}_{s,a}t \left( \ln \ln(2t) + \ln \frac{5.2}{\delta} \right)} - 0.41 \left( 1.4 \ln \ln(2t) + \ln \frac{5.2}{\delta} \right) \quad (28) \\ &\stackrel{(i)}{\geq} t\mathbf{q}_{s,a} - \frac{t\mathbf{q}_{s,a}}{2} - \frac{3}{2} \left( \ln \ln(2t) + \ln \frac{5.2}{\delta} \right) \\ &= \frac{t\mathbf{q}_{s,a}}{2} - \frac{3}{2} \left( \ln \ln(2t) + \ln \frac{5.2}{\delta} \right) \end{aligned}$$

Inequality (i) holds because  $\sqrt{\mathbf{q}_{s,a}t \left( \ln \ln(2t) + \ln \frac{5.2}{\delta} \right)} \leq \frac{\mathbf{q}_{s,a}t}{2} + \frac{\ln \ln(2t) + \ln \frac{5.2}{\delta}}{2}$ . As a consequence of Assumption 2 we can infer that with probability at least  $1 - \delta$  for all  $t$  such that  $\ln \ln(2t) + \ln \frac{5.2}{\delta} \leq \frac{t\beta}{6} \leq \frac{t\mathbf{q}_{s,a}}{6}$ :

$$N_t(s, a) \geq \frac{t\mathbf{q}_{s,a}}{4}$$

The same sequence of inequalities but inverted implies the upper bound result. The last result is a simple consequence of the union bound. To obtain the stronger bound we start by noting that since  $\frac{t}{\ln \ln(2t)} \geq \frac{1 + \ln \frac{5.2}{\delta}}{\beta\epsilon^2} \geq \frac{1 + \ln \frac{5.2}{\delta}}{\mathbf{q}_{s,a}\epsilon^2}$  for all  $(s, a)$  we can transform Equation 28 as:

$$\begin{aligned} N_t(s, a) &\geq t\mathbf{q}_{s,a} - 1.44\sqrt{\mathbf{q}_{s,a}t \left( \ln \ln(2t) + \ln \frac{5.2}{\delta} \right)} - 0.41 \left( 1.4 \ln \ln(2t) + \ln \frac{5.2}{\delta} \right) \\ &\geq t\mathbf{q}_{s,a} - 2.88\sqrt{\mathbf{q}_{s,a}t \ln \ln(2t) \left( 1 + \ln \frac{5.2}{\delta} \right)} - 0.81 \ln \ln(2t) \left( 1 + \ln \frac{5.2}{\delta} \right) \\ &\geq t\mathbf{q}_{s,a} - 3.69\sqrt{\mathbf{q}_{s,a}t \ln \ln(2t) \left( 1 + \ln \frac{5.2}{\delta} \right)} \\ &\geq t\mathbf{q}_{s,a} - 3.69\mathbf{q}_{s,a}\epsilon \end{aligned}$$

The same sequence of inequalities but inverted implies the upper bound. This finishes the proof.  $\square$

The gradients of  $J_D(\mathbf{v})$  can be written as:

$$\begin{aligned} (\nabla_{\mathbf{v}} J_D(\mathbf{v}))_s &= (1 - \gamma)\boldsymbol{\mu}_s + \gamma \sum_{s', a} \frac{\exp(\eta \mathbf{A}_{s', a}^{\mathbf{v}}) \mathbf{q}_{s', a}}{\mathbf{Z}} P_a(s|s') - \\ &\quad \sum_a \frac{\exp(\eta \mathbf{A}_{s, a}^{\mathbf{v}}) \mathbf{q}_{s, a}}{\mathbf{Z}}, \end{aligned}$$

Where  $Z = \sum_{s,a} \exp(\eta \mathbf{A}_{s,a}^{\mathbf{v}}) \mathbf{q}_{s,a}$ . We will work under the assumption that  $\mathbf{q}_{s,a} \propto \exp(\eta \mathbf{A}_{s,a}^{\mathbf{v}'})$  for some value vector  $\mathbf{v}'$ . Given a value vector  $\mathbf{v}$  we denote its induced policy  $\pi^{\mathbf{v}}$  as:

$$\pi^{\mathbf{v}}(a|s) = \frac{\exp(\eta \mathbf{A}_{s,a}^{\mathbf{v}}) \mathbf{q}_{s,a}}{\mathbf{Z}_s}$$

Where  $\mathbf{Z}_s = \sum_a \exp(\eta \mathbf{A}_{s,a}^{\mathbf{v}}) \mathbf{q}_{s,a}$ . If we define  $\mathbf{q}_s = \sum_a \mathbf{q}_{s,a}$ , and we define  $\mathbf{q}_{a|s} = \frac{\mathbf{q}_{s,a}}{\mathbf{q}_s}$  then we can write:

$$\pi^{\mathbf{v}}(a|s) = \frac{\exp(\eta \mathbf{A}_{s,a}^{\mathbf{v}}) \mathbf{q}_{a|s}}{\mathbf{Z}_{a|s}}$$

Where  $\mathbf{Z}_s = \sum_a \exp(\eta \mathbf{A}_{s,a}^{\mathbf{v}}) \mathbf{q}_{a|s}$ . We work under the assumption that  $\mathbf{q}_{a|s}$  is a policy, and therefore known to the learner. We start by showing how to maintain a good estimator  $\hat{\mathbf{A}}_{s,a}^{\mathbf{v}}$  using stochastic gradient descent over a quadratic objective. Let  $\mathbf{W}_{s,a}^{\mathbf{v}} = \sum_{s'} P_a(s'|s) \mathbf{v}_{s'}$  so that  $\mathbf{A}_{s,a}^{\mathbf{v}} = \mathbf{r}_{s,a} - \mathbf{v}_s + \gamma \mathbf{W}_{s,a}^{\mathbf{v}}$  where both  $\mathbf{W}^{\mathbf{v}}$  and  $\widehat{\mathbf{W}}^{\mathbf{v}}$  are seen as vectors in  $\mathbb{R}^{|\mathcal{S}| \times |\mathcal{A}|}$ .

If we had access to an estimator  $\widehat{\mathbf{W}}^{\mathbf{v}}$  of  $\mathbf{W}^{\mathbf{v}}$  such that for some  $\epsilon \in (0, 1)$ :

$$\|\mathbf{W}^{\mathbf{v}} - \widehat{\mathbf{W}}^{\mathbf{v}}\|_{\infty} \leq \epsilon. \quad (29)$$

We can use  $\widehat{\mathbf{W}}^{\mathbf{v}}$  to produce an estimator of  $\mathbf{A}_{s,a}^{\mathbf{v}}$  via  $\hat{\mathbf{A}}_{s,a}^{\mathbf{v}} = \mathbf{r}_{s,a} - \mathbf{v}_s + \gamma \widehat{\mathbf{W}}_{s,a}^{\mathbf{v}}$  such that:

$$\|\hat{\mathbf{A}}^{\mathbf{v}} - \mathbf{A}^{\mathbf{v}}\|_{\infty} \leq \gamma \epsilon.$$

We now consider the problem of estimating  $\mathbf{W}^{\mathbf{v}}$  from samples. We assume the following stochastic setting:

1. The learner receives samples  $\{(s_{\ell}, a_{\ell}, s'_{\ell})\}_{\ell=1}^{\infty}$  such that  $(s_{\ell}, a_{\ell}) \sim \mathbf{q}$  while  $s'_{\ell} \sim P_{a_{\ell}}(\cdot | s_{\ell})$ . Let  $N_t(s, a) = \sum_{\ell=1}^t \mathbf{1}(s_{\ell}, a_{\ell} = s, a)$ .
2. Define  $\widehat{\mathbf{W}}_{s,a}^{\mathbf{v}}(t) = \frac{1}{N_t(s,a)} \sum_{\ell=1}^t \mathbf{1}(s_{\ell}, a_{\ell} = s, a) \mathbf{v}_{s'_{\ell}}$ . Notice that for all  $s, a \in \mathcal{S} \times \mathcal{A}$ , the estimator's noise  $\xi_{s,a}(t) = \widehat{\mathbf{W}}_{s,a}^{\mathbf{v}}(t) - \mathbf{W}_{s,a}^{\mathbf{v}}$  satisfies  $\mathbb{E}[\xi_{s,a}(t) | \mathcal{F}_{t-1}] = 0$  and  $|\xi_{s,a}(t)| \leq 2\|\mathbf{v}'\|_{\infty}$ . Where  $\mathcal{F}_{t-1}$  is the sigma algebra corresponding to all the algorithmic choices up to round  $t-1$ .

**Lemma 15.** Let  $\{(s_{\ell}, a_{\ell}, s'_{\ell})\}_{\ell=1}^{\infty}$  samples generated as above. Let  $\widehat{\mathbf{W}}^{\mathbf{v}}(t)$  be the empirical estimator of  $\mathbf{W}^{\mathbf{v}}$  defined as:

$$\widehat{\mathbf{W}}_{s,a}^{\mathbf{v}}(t) = \frac{1}{N_t(s,a)} \sum_{\ell=1}^t \mathbf{1}(s_{\ell}, a_{\ell} = s, a) \mathbf{v}_{s'_{\ell}}.$$

Where  $N_t(s, a) = \sum_{\ell=1}^t \mathbf{1}(s_{\ell}, a_{\ell} = s, a)$ . Let  $\delta \in (0, 1)$ . With probability at least  $1 - (2|\mathcal{S}||\mathcal{A}|)\delta$  for all  $t \in \mathbb{N}$  such that  $\ln \ln(2t) + \ln \frac{5.2}{\delta} \leq \frac{t\beta}{6}$  and for all  $(s, a) \in \mathcal{S}$  simultaneously:

$$\|\mathbf{W}_{s,a}^{\mathbf{v}} - \widehat{\mathbf{W}}_{s,a}^{\mathbf{v}}(t)\| \leq 8\|\mathbf{v}\|_{\infty} \left( \sqrt{\frac{\ln \ln(2t) + \ln \frac{10.4}{\delta}}{t\beta}} + \frac{\ln \ln(2t) + \ln \frac{10.4}{\delta}}{t\beta} \right).$$

*Proof.* Consider the martingale difference sequence  $X_{s,a}(\ell) = \mathbf{1}(s_{\ell}, a_{\ell} = s, a) (\mathbf{W}_{s,a}^{\mathbf{v}} - \mathbf{v}_{s'_{\ell}})$ . Notice that for all  $s, a \in \mathcal{S} \times \mathcal{A}$   $|X_{s,a}(t)| \leq 2\|\mathbf{v}'\|_{\infty}$ . The process  $S_t = \sum_{\ell=1}^t X_{s,a}(\ell)$  with variance process  $W_t = \sum_{\ell=1}^t \mathbb{E}[X_{s,a}^2(\ell) | \mathcal{F}_{\ell-1}]$  satisfies the sub- $\psi_P$  condition of [16] with constant  $c = 2\|\mathbf{v}'\|_{\infty}$  (see Bennet case in Table 3 of [16]). By Lemma 13 the bound:

$$S_t \leq 1.44 \sqrt{(W_t \vee m) \left( 1.4 \ln \ln(2(W_t/m \vee 1)) + \ln \frac{5.2}{\delta} \right)} + 0.81 \|\mathbf{v}\|_{\infty} \left( 1.4 \ln \ln \left( 2 \left( \frac{W_t}{m} \vee 1 \right) \right) + \ln \frac{5.2}{\delta} \right)$$

holds for all  $t \in \mathbb{N}$  with probability at least  $1 - \delta$ . Notice that  $\mathbb{E}[X_{s,a}^2(\ell) | \mathcal{F}_{\ell-1}] \leq 4\|\mathbf{v}\|_\infty^2 \text{Var}_{\mathbf{q}}(\mathbf{1}_{s,a}) = 4\|\mathbf{v}\|_\infty^2 \mathbf{q}_{s,a}(1 - \mathbf{q}_{s,a}) \leq \mathbf{q}_{s,a}\|\mathbf{v}\|_\infty^2$  and therefore  $W_t \leq t\mathbf{q}_{s,a}\|\mathbf{v}\|_\infty^2$ . We set  $m = \mathbf{q}_{s,a}\|\mathbf{v}\|_\infty^2$ . And obtain that with probability  $1 - \delta$  and for all  $t \in \mathbb{N}$ :

$$\left| \underbrace{\frac{1}{N_t(s,a)} \sum_{\ell=1}^t \mathbf{1}(s_\ell = s, a_\ell = 1) \mathbf{v}_{s'_\ell}}_{\widehat{\mathbf{W}}_{s,a}^{\mathbf{v}}(t)} - \mathbf{W}_{s,a}^{\mathbf{v}} \right| \leq \frac{1}{N_t(s,a)} \left( 1.44\|\mathbf{v}\|_\infty \sqrt{\mathbf{q}_{s,a}t \left( \ln \ln(2t) + \ln \frac{10.4}{\delta} \right)} + 0.81\|\mathbf{v}\|_\infty \left( 1.4 \ln \ln(2t) + \ln \frac{10.2}{\delta} \right) \right) \quad (30)$$

As a consequence of Lemma 14 we know that with probability at least  $1 - \delta$  for all  $t$  such that  $\ln \ln(2t) + \ln \frac{5.2}{\delta} \leq \frac{t\beta}{6} \leq \frac{t\mathbf{q}_{s,a}}{6}$ :

$$N_t(s,a) \geq \frac{t\mathbf{q}_{s,a}}{4}$$

Plugging this into Equation 30 and applying a union bound over all  $s, a \in \mathcal{S} \times \mathcal{A}$  yields that for all  $t$  such that  $\ln \ln(2t) + \ln \frac{5.2}{\delta} \leq \frac{t\beta}{6} \leq \frac{t\mathbf{q}_{s,a}}{6}$  and with probability  $1 - 2|S||A|\delta$  for all  $s, a \in \mathcal{S}$  simultaneously:

$$\begin{aligned} |\mathbf{W}_{s,a}^{\mathbf{v}} - \widehat{\mathbf{W}}_{s,a}^{\mathbf{v}}(t)| &\leq \frac{4}{t\mathbf{q}_{s,a}} \left( 1.44\|\mathbf{v}\|_\infty \sqrt{t\mathbf{q}_{s,a} \ln \ln(2t) + t \ln \frac{10.4}{\delta}} + 0.81\|\mathbf{v}\|_\infty \left( 1.4 \ln \ln(2t) + \ln \frac{10.4}{\delta} \right) \right) \\ &\leq 8\|\mathbf{v}\|_\infty \left( \sqrt{\frac{\ln \ln(2t) + \ln \frac{10.4}{\delta}}{t\mathbf{q}_{s,a}}} + \frac{\ln \ln(2t) + \ln \frac{10.4}{\delta}}{t\mathbf{q}_{s,a}} \right) \\ &\leq 8\|\mathbf{v}\|_\infty \left( \sqrt{\frac{\ln \ln(2t) + \ln \frac{10.4}{\delta}}{t\beta}} + \frac{\ln \ln(2t) + \ln \frac{10.4}{\delta}}{t\beta} \right). \end{aligned}$$

The result follows.  $\square$

We can now derive a concentration result for  $\widehat{\mathbf{A}}_{s,a}^{\mathbf{v}}(t) = \mathbf{r}_{s,a} - \mathbf{v}_s + \gamma \widehat{\mathbf{W}}_{s,a}^{\mathbf{v}}(t)$ , the advantage estimator resulting from  $\widehat{\mathbf{W}}_{s,a}^{\mathbf{v}}(t)$ :

**Corollary 3.** *Let  $\delta \in (0, 1)$ . With probability at least  $1 - (2|S||A|)\delta$  for all  $t \in \mathbb{N}$  such that  $\ln \ln(2t) + \ln \frac{5.2}{\delta} \leq \frac{t\beta}{6}$  and for all  $(s, a) \in \mathcal{S}$  simultaneously:*

$$|\mathbf{A}_{s,a}^{\mathbf{v}} - \widehat{\mathbf{A}}_{s,a}^{\mathbf{v}}(t)| \leq 8\gamma\|\mathbf{v}\|_\infty \left( \sqrt{\frac{\ln \ln(2t) + \ln \frac{10.4}{\delta}}{t\beta}} + \frac{\ln \ln(2t) + \ln \frac{10.4}{\delta}}{t\beta} \right).$$

And therefore:

$$|\mathbf{A}_{s,a}^{\mathbf{v}} - \widehat{\mathbf{A}}_{s,a}^{\mathbf{v}}(t)| \leq 16\gamma\|\mathbf{v}\|_\infty \sqrt{\frac{\ln \ln(2t) + \ln \frac{10.4}{\delta}}{t\beta}}$$

## H.1 Estimating the Gradients

**Lemma 16.** *If  $\xi \in \mathbb{R}$  such that  $|\xi| \leq \epsilon < 1$ , and  $y \in \mathbb{R}$ , then:*

$$\exp(y) (1 - \epsilon) \leq \exp(y + \xi) \leq \exp(y) (1 + 2\epsilon)$$

*Proof.* Notice that for  $\epsilon \in (0, 1)$ :

$$\exp(\epsilon) \leq 1 + 2\epsilon, \quad \text{and } 1 - \epsilon \leq \exp(-\epsilon).$$

The result follows by noting that:

$$\exp(y) \exp(-|\xi|) \leq \exp(y + \xi) \leq \exp(y) \exp(|\xi|).$$

$\square$

A simple consequence of Lemma 16 is the following:

**Lemma 17.** *Let  $\epsilon \in (0, 1/2)$ . If  $\mathbf{C}, \widehat{\mathbf{C}} \in \mathbb{R}^{|\mathcal{S}| \times |\mathcal{A}|}$  and  $\widehat{\mathbf{b}}, \mathbf{b} \in \mathbb{R}_+^{|\mathcal{S}| \times |\mathcal{A}|}$  are two vectors satisfying:*

$$\|\widehat{\mathbf{C}} - \mathbf{C}\|_\infty \leq \epsilon, \quad |\widehat{\mathbf{b}}_{s,a} - \mathbf{b}_{s,a}| \leq \epsilon \mathbf{b}_{s,a}.$$

*For all  $s, a \in \mathcal{S} \times \mathcal{A}$  define  $\mathbf{B}_{s,a} = \frac{\exp(\mathbf{C}_{s,a})}{\mathbf{Z}}$  and  $\widehat{\mathbf{B}}_{s,a} = \frac{\exp(\widehat{\mathbf{C}}_{s,a})}{\widehat{\mathbf{Z}}}$  where  $\mathbf{Z} = \sum_{s,a} \exp(\mathbf{C}_{s,a}) \mathbf{b}_{s,a}$  and  $\widehat{\mathbf{Z}} = \sum_{s,a} \exp(\widehat{\mathbf{C}}_{s,a}) \widehat{\mathbf{b}}_{s,a}$ :*

$$\left| \widehat{\mathbf{B}}_{s,a} - \mathbf{B}_{s,a} \right| \leq 38\epsilon \mathbf{B}_{s,a} \leq 38\epsilon.$$

*Proof.* Let's define an intermediate  $\widetilde{\mathbf{B}}_{s,a} = \frac{\exp(\mathbf{C}_{s,a}) \widehat{\mathbf{b}}_{s,a}}{\widetilde{\mathbf{Z}}}$  where  $\widetilde{\mathbf{Z}} = \sum_{s,a} \exp(\mathbf{C}_{s,a}) \widehat{\mathbf{b}}_{s,a}$ . By Lemma 16 we can conclude that for any  $s, a \in \mathcal{S} \times \mathcal{A}$ :

$$\widetilde{\mathbf{B}}_{s,a} \frac{1-\epsilon}{1+2\epsilon} \leq \widehat{\mathbf{B}}_{s,a} \leq \frac{1+2\epsilon}{1-\epsilon} \widetilde{\mathbf{B}}_{s,a}$$

And therefore:

$$\widehat{\mathbf{B}}_{s,a}, \widetilde{\mathbf{B}}_{s,a} \in \left[ \widetilde{\mathbf{B}}_{s,a} \frac{1-\epsilon}{1+2\epsilon}, \frac{1+2\epsilon}{1-\epsilon} \widetilde{\mathbf{B}}_{s,a} \right]$$

Which in turn implies that:

$$\left| \widehat{\mathbf{B}}_{s,a} - \widetilde{\mathbf{B}}_{s,a} \right| \leq \left( \frac{1+2\epsilon}{1-\epsilon} - \frac{1-\epsilon}{1+2\epsilon} \right) \widetilde{\mathbf{B}}_{s,a} \leq 15\epsilon \widetilde{\mathbf{B}}_{s,a}.$$

We now bound  $|\widetilde{\mathbf{B}}_{s,a} - \mathbf{B}_{s,a}|$ . By assumption for all  $s, a \in \mathcal{S} \times \mathcal{A}$ , it follows that  $\widehat{\mathbf{b}}_{s,a}(1-\epsilon) \leq \mathbf{b}_{s,a} \leq \widehat{\mathbf{b}}_{s,a}(1+\epsilon)$  and therefore:

$$\frac{\mathbf{B}_{s,a}}{1+\epsilon} \leq \widetilde{\mathbf{B}}_{s,a} \leq \frac{\mathbf{B}_{s,a}}{1-\epsilon}$$

And therefore:

$$\widetilde{\mathbf{B}}_{s,a}, \mathbf{B}_{s,a} \in \left[ \frac{\mathbf{B}_{s,a}}{1+\epsilon}, \frac{\mathbf{B}_{s,a}}{1-\epsilon} \right].$$

Hence:

$$\left| \widetilde{\mathbf{B}}_{s,a} - \mathbf{B}_{s,a} \right| \leq \left( \frac{1}{1-\epsilon} - \frac{1}{1+\epsilon} \right) \mathbf{B}_{s,a} \leq \frac{8}{3}\epsilon \mathbf{B}_{s,a}.$$

And therefore:

$$\left| \widehat{\mathbf{B}}_{s,a} - \mathbf{B}_{s,a} \right| \leq \left| \widehat{\mathbf{B}}_{s,a} - \widetilde{\mathbf{B}}_{s,a} \right| + \left| \widetilde{\mathbf{B}}_{s,a} - \mathbf{B}_{s,a} \right| \leq 15\epsilon \widetilde{\mathbf{B}}_{s,a} + \frac{8}{3}\epsilon \mathbf{B}_{s,a} \leq \left( 15\epsilon \left( 1 + \frac{8}{3}\epsilon \right) + \frac{8}{3}\epsilon \right) \mathbf{B}_{s,a} \leq 38\epsilon \mathbf{B}_{s,a}.$$

The result follows. □

If we set  $\mathbf{C} = \eta \mathbf{A}^\mathbf{v}$ ,  $\widehat{\mathbf{C}} = \eta \widehat{\mathbf{A}}^\mathbf{v}$  we obtain the following corollary of Lemma 17:

**Corollary 4.** *Let  $\epsilon \in (0, 1/2)$ . If  $\widehat{\mathbf{A}}^\mathbf{v}$  and  $\widehat{\mathbf{q}}$  satisfies:*

$$\|\widehat{\mathbf{A}}^\mathbf{v} - \mathbf{A}^\mathbf{v}\|_\infty \leq \epsilon, \quad \text{and} \quad |\widehat{\mathbf{q}}_{s,a} - \mathbf{q}_{s,a}| \leq \epsilon \mathbf{q}_{s,a}$$

*Then:*

$$\left| \widehat{\mathbf{B}}_{s,a}^\mathbf{v} - \mathbf{B}_{s,a}^\mathbf{v} \right| \leq 111\eta\epsilon \mathbf{B}_{s,a}^\mathbf{v} \leq 111\eta\epsilon.$$

We can combine the sample complexity results of Corollary 3 and the approximation results of Corollary 4 and Lemma 14 to obtain:

**Corollary 5.** *If  $\delta, \xi \in (0, 1)$ , with probability at least  $1 - (4|S||\mathcal{A}|\delta)$  for all  $t$  such that:*

$$\frac{t}{\ln \ln(2t)} \geq \frac{120(\ln \frac{10.4}{\delta} + 1)}{\beta \xi^2} \max(480\eta^2\gamma^2\|\mathbf{v}\|_\infty^2, 1)$$

then for all  $(s, a) \in \mathcal{S} \times \mathcal{A}$  simultaneously:

$$\left| \widehat{\mathbf{B}}_{s,a}^{\mathbf{v}}(t) - \mathbf{B}_{s,a}^{\mathbf{v}} \right| \leq \xi \mathbf{B}_{s,a}^{\mathbf{v}} \leq \frac{\xi}{\beta}, \quad \text{and} \quad \widehat{\mathbf{B}}_{s,a}^{\mathbf{v}} \leq \mathbf{B}_{s,a}^{\mathbf{v}} \left(1 + \frac{\xi}{\beta}\right) \leq \frac{1}{\beta} \left(1 + \frac{\xi}{\beta}\right).$$

## H.2 Biased Stochastic Gradients

Notice that:

$$\begin{aligned} (\nabla_{\mathbf{v}} J_D(\mathbf{v}))_s &= (1 - \gamma)\boldsymbol{\mu}_s + \gamma \sum_{s', a} \frac{\exp(\eta \mathbf{A}_{s', a}^{\mathbf{v}}) \mathbf{q}_{s', a}}{\mathbf{Z}} P_a(s|s') - \sum_a \frac{\exp(\eta \mathbf{A}_{s, a}^{\mathbf{v}}) \mathbf{q}_{s, a}}{\mathbf{Z}} \\ &= (1 - \gamma)\boldsymbol{\mu}_s + \gamma \mathbb{E}_{(s', a) \sim \mathbf{q}, s'' \sim P_a(\cdot|s')} [\mathbf{B}_{s', a}^{\mathbf{v}} \mathbf{1}(s'' = s)] - \mathbb{E}_{(s', a) \sim \mathbf{q}} [\mathbf{B}_{s, a}^{\mathbf{v}} \mathbf{1}(s' = s)] \\ &= (1 - \gamma)\boldsymbol{\mu}_s + \mathbb{E}_{(s', a) \sim \mathbf{q}, s'' \sim P_a(\cdot|s')} [\mathbf{B}_{s', a}^{\mathbf{v}} (\gamma \mathbf{1}(s'' = s) - \mathbf{1}(s' = s))], \end{aligned}$$

We now proceed to bound the bias of this estimator and prove a more fine grained version of Lemma 8

**Lemma 18.** *Let  $\delta, \xi \in (0, 1)$ . With probability at least  $1 - \delta$  for all  $t \in \mathbb{N}$  such that*

$$\frac{t}{\ln \ln(2t)} \geq \frac{120(\ln \frac{41.6|S||\mathcal{A}|}{\delta} + 1)}{\beta \xi^2} \max(480\eta^2\gamma^2\|\mathbf{v}\|_\infty^2, 1)$$

the plugin estimator  $\widehat{\nabla}_{\mathbf{v}} J_D(\mathbf{v})$  satisfies:

$$\max_{u \in \{1, 2, \infty\}} \left\| \widehat{\nabla}_{\mathbf{v}} J_D(\mathbf{v}) - \mathbb{E}_{s_{t+1}, a_{t+1}, s'_{t+1}} \left[ \widehat{\nabla}_{\mathbf{v}} J_D(\mathbf{v}) \middle| \widehat{\mathbf{B}}^{\mathbf{v}}(t) \right] \right\|_u \leq \frac{4}{\beta} \left(1 + \frac{\xi}{\beta}\right) \quad (31)$$

$$\max_{u \in \{1, 2, \infty\}} \left\| \mathbb{E} \left[ \widehat{\nabla}_{\mathbf{v}} J_D(\mathbf{v}) \right] - \nabla_{\mathbf{v}} J_D(\mathbf{v}) \right\|_u \leq 2(1 + \gamma)\xi \left(1 + \frac{\xi}{\beta}\right), \quad (32)$$

$$\mathbb{E} \left[ \left\| \widehat{\nabla}_{\mathbf{v}} J_D(\mathbf{v}) - \mathbb{E}_{s_{t+1}, a_{t+1}, s'_{t+1}} \left[ \widehat{\nabla}_{\mathbf{v}} J_D(\mathbf{v}) \middle| \widehat{\mathbf{B}}^{\mathbf{v}}(t) \right] \right\|_2^2 \middle| \widehat{\mathbf{B}}^{\mathbf{v}}(t) \right] \leq (1 + \gamma^2)(1 + 4\xi) \frac{1}{\beta} \left(1 + \frac{\xi}{\beta}\right) \quad (33)$$

*Proof.* As a consequence of Corollary 5 we can conclude that for all  $t$  satisfying the assumptions of the Lemma and with probability at least  $1 - \delta$  simultaneously for all  $(s, a) \in \mathcal{S} \times \mathcal{A}$ :

$$\left| \widehat{\mathbf{B}}_{s,a}^{\mathbf{v}}(t) - \mathbf{B}_{s,a}^{\mathbf{v}} \right| \leq \xi \mathbf{B}_{s,a}^{\mathbf{v}} \left(1 + \frac{\xi}{\beta}\right), \quad \text{and} \quad \widehat{\mathbf{B}}_{s,a}^{\mathbf{v}} \leq \mathbf{B}_{s,a}^{\mathbf{v}} \left(1 + \frac{\xi}{\beta}\right) \leq \frac{1}{\beta} \left(1 + \frac{\xi}{\beta}\right). \quad (34)$$

Let's start by bounding the first term. Notice that  $\widehat{\nabla}_{\mathbf{v}} J_D(\mathbf{v}) - (1 - \gamma)\boldsymbol{\mu}$  has at most 2 nonzero entries and therefore:

$$\max_{u \in \{1, 2, \infty\}} \left\| \widehat{\nabla}_{\mathbf{v}} J_D(\mathbf{v}) - (1 - \gamma)\boldsymbol{\mu} \right\|_u \leq \frac{2}{\beta} \left(1 + \frac{\xi}{\beta}\right).$$

Therefore for all  $u \in \{1, 2, \infty\}$ :

$$\left\| \mathbb{E}_{s_{t+1}, a_{t+1}, s'_{t+1}} \left[ \widehat{\nabla}_{\mathbf{v}} J_D(\mathbf{v}) - (1 - \gamma)\boldsymbol{\mu} \middle| \widehat{\mathbf{B}}^{\mathbf{v}}(t) \right] \right\|_u \leq \mathbb{E}_{s_{t+1}, a_{t+1}, s'_{t+1}} \left[ \left\| \widehat{\nabla}_{\mathbf{v}} J_D(\mathbf{v}) - (1 - \gamma)\boldsymbol{\mu} \right\|_u \middle| \widehat{\mathbf{B}}^{\mathbf{v}}(t) \right] \leq \frac{2}{\beta} \left(1 + \frac{\xi}{\beta}\right).$$



$$\begin{aligned} \left\| \widehat{\nabla}_{\mathbf{v}} J_D(\mathbf{v}) - \mathbb{E} \left[ \widehat{\nabla}_{\mathbf{v}} J_D(\mathbf{v}) \middle| \widehat{\mathbf{B}}^{\mathbf{v}}(t) \right] \right\|_u &\leq \left\| \widehat{\nabla}_{\mathbf{v}} J_D(\mathbf{v}) - (1 - \gamma) \boldsymbol{\mu} \right\|_u + \left\| \mathbb{E} \left[ \widehat{\nabla}_{\mathbf{v}} J_D(\mathbf{v}) \middle| \widehat{\mathbf{B}}^{\mathbf{v}}(t) \right] - (1 - \gamma) \boldsymbol{\mu} \right\|_u \\ &\leq \frac{4}{\beta} \left( 1 + \frac{\xi}{\beta} \right) \end{aligned}$$

Furthermore, notice that the following estimator of  $\nabla_{\mathbf{v}} J_D(\mathbf{v})$  is unbiased:

$$\left( \widetilde{\nabla}_{\mathbf{v}} J_D(\mathbf{v}) \right)_s = (1 - \gamma) \boldsymbol{\mu}_s + \mathbf{B}_{s_{t+1}, a_{t+1}}^{\mathbf{v}}(t) (\gamma \mathbf{1}(s'_{t+1} = s) - \mathbf{1}(s_{t+1} = s)).$$

We conclude that for all  $s \in \mathcal{S}$ :

$$\left( \widehat{\nabla}_{\mathbf{v}} J_D(\mathbf{v}) \right)_s - \left( \widetilde{\nabla}_{\mathbf{v}} J_D(\mathbf{v}) \right)_s = (\gamma \mathbf{1}(s'_{t+1} = s) - \mathbf{1}(s_{t+1} = s)) \left( \widehat{\mathbf{B}}_{s_{t+1}, a_{t+1}}^{\mathbf{v}}(t) - \mathbf{B}_{s_{t+1}, a_{t+1}}^{\mathbf{v}}(t) \right)$$

Consequently  $\widehat{\nabla}_{\mathbf{v}} J_D(\mathbf{v}) - \widetilde{\nabla}_{\mathbf{v}} J_D(\mathbf{v})$  has at most 2 nonzero entries. Now observe that any nonzero entry  $s$  satisfies:

$$\begin{aligned} \left| \mathbb{E} \left[ \left( \widehat{\nabla}_{\mathbf{v}} J_D(\mathbf{v}) \right)_s \right] - \left( \nabla_{\mathbf{v}} J_D(\mathbf{v}) \right)_s \right| &= \left| \mathbb{E}_{s_{t+1}, a_{t+1} \sim \mathbf{q}} \left[ \left( \widehat{\nabla}_{\mathbf{v}} J_D(\mathbf{v}) \right)_s - \left( \widetilde{\nabla}_{\mathbf{v}} J_D(\mathbf{v}) \right)_s \right] \right| \\ &\leq \mathbb{E}_{s_{t+1}, a_{t+1} \sim \mathbf{q}} \left[ |\gamma \mathbf{1}(s'_{t+1} = s) - \mathbf{1}(s_{t+1} = s)| \left| \widehat{\mathbf{B}}_{s_{t+1}, a_{t+1}}^{\mathbf{v}}(t) - \mathbf{B}_{s_{t+1}, a_{t+1}}^{\mathbf{v}}(t) \right| \right] \\ &\stackrel{(i)}{\leq} \mathbb{E}_{s_{t+1}, a_{t+1} \sim \mathbf{q}} \left[ (\gamma \mathbf{1}(s'_{t+1} = s) + \mathbf{1}(s_{t+1} = s)) \xi \mathbf{B}_{s_{t+1}, a_{t+1}}^{\mathbf{v}} \left( 1 + \frac{\xi}{\beta} \right) \right] \\ &\leq (1 + \gamma) \xi \left( 1 + \frac{\xi}{\beta} \right) \mathbb{E}_{s_{t+1}, a_{t+1} \sim \mathbf{q}} [\mathbf{B}_{s_{t+1}, a_{t+1}}] \\ &= (1 + \gamma) \xi \left( 1 + \frac{\xi}{\beta} \right) \end{aligned}$$

Inequality (i) holds by the triangle inequality and Equation 34 and because  $\mathbf{B}_{s,a}^{\mathbf{v}} \geq 0$ . This finishes the proof of the first result. Since  $\widehat{\nabla}_{\mathbf{v}} J_D(\mathbf{v}) - \widetilde{\nabla}_{\mathbf{v}} J_D(\mathbf{v})$  has at most 2 nonzero entries for all  $u \in \{1, 2, \infty\}$ :

$$\left\| \mathbb{E} \left[ \left( \widehat{\nabla}_{\mathbf{v}} J_D(\mathbf{v}) \right)_s \right] - \left( \nabla_{\mathbf{v}} J_D(\mathbf{v}) \right)_s \right\|_u \leq 2(1 + \gamma) \xi \left( 1 + \frac{\xi}{\beta} \right)$$

The second inequality follows.

Recall that for any  $s$ :

$$\left( \widehat{\nabla}_{\mathbf{v}} J_D(\mathbf{v}) \right)_s = (1 - \gamma) \boldsymbol{\mu}_s + \widehat{\mathbf{B}}_{s_{t+1}, a_{t+1}}^{\mathbf{v}}(t) (\gamma \mathbf{1}(s'_{t+1} = s) - \mathbf{1}(s_{t+1} = s)).$$

Observe that:

$$\begin{aligned} \mathbb{E} \left[ \left\| \widehat{\nabla}_{\mathbf{v}} J_D(\mathbf{v}) - \mathbb{E} \left[ \widehat{\nabla}_{\mathbf{v}} J_D(\mathbf{v}) \middle| \widehat{\mathbf{B}}^{\mathbf{v}}(t) \right] \right\|_2^2 \middle| \widehat{\mathbf{B}}^{\mathbf{v}}(t) \right] &\leq \mathbb{E} \left[ \left\| \widehat{\nabla}_{\mathbf{v}} J_D(\mathbf{v}) \right\|_2^2 \middle| \widehat{\mathbf{B}}^{\mathbf{v}}(t) \right] \\ &= \sum_{s', a} \left( \widehat{\mathbf{B}}_{s', a}^{\mathbf{v}}(t) \right)^2 \gamma^2 \mathbf{q}_{s', a} P_a(s|s') + \\ &\quad \sum_a \left( \widehat{\mathbf{B}}_{s, a}^{\mathbf{v}}(t) \right)^2 \mathbf{q}_{s, a} (1 - 2\gamma) P_a(s|s) \\ &\leq (1 + \gamma^2) \mathbb{E}_{(s', a) \sim \widehat{\mathbf{q}}(t) | \widehat{\mathbf{B}}^{\mathbf{v}}(t)} \left[ \widehat{\mathbf{B}}_{s', a}^{\mathbf{v}}(t) \frac{\mathbf{q}_{s', a}}{\widehat{\mathbf{q}}_{s', a}} \right] \\ &\stackrel{(i)}{\leq} (1 + \gamma^2) (1 + 4\xi) \frac{1}{\beta} \left( 1 + \frac{\xi}{\beta} \right). \end{aligned}$$

Inequality (i) follows because  $\widehat{\mathbf{B}}_{s, a}^{\mathbf{v}} \mathbf{q}_{s, a} \leq \frac{\mathbf{q}_{s, a}}{\widehat{\mathbf{q}}_{s, a}} \leq (1 + 4\xi)$  and because by Corollary 5 we have that  $\widehat{\mathbf{B}}_{s, a}^{\mathbf{v}} \leq \frac{1}{\beta} \left( 1 + \frac{\xi}{\beta} \right)$ .

The result follows.  $\square$

Combining the guarantees of Lemma 9 and 8 for Algorithm 3 applied to the objective function  $J_D$ :

**Lemma 19.** Let  $\xi_t = \min(\sqrt{\frac{c'}{t}}, \beta)$  for all  $t$  where  $c' = 2(|\mathcal{S}| + 1)^2 \eta^2 D^2 + \frac{320}{\beta^2} + 240$  and  $D = \frac{1}{1-\gamma} \left(1 + \frac{\log \frac{|\mathcal{S}||\mathcal{A}|}{\beta\rho}}{\eta}\right)$ . If  $n(t)$  is such that:

$$\frac{n(t)}{\ln \ln(2n(t))} \geq \frac{120 \left( \ln \frac{83.2|\mathcal{S}||\mathcal{A}|t^2}{\delta} + 1 \right)}{\beta \xi_t^2} \max(280\eta^2\gamma^2 \|\mathbf{v}_t\|_\infty^2, 1) \quad (35)$$

And  $\tau_t = \frac{c}{\sqrt{t}}$  where  $c = \frac{D}{2\sqrt{c'}}$  then for all  $t \geq 1$  we have that with probability at least  $1 - 2\delta$  and simultaneously for all  $T \in \mathbb{N}$ :

$$J_D \left( \frac{1}{T} \sum_{t=1}^T \mathbf{v}_t \right) \leq J_D(\mathbf{v}_*) + \frac{36D}{\sqrt{T}} \max \left( (|\mathcal{S}| + 1) \eta D, \frac{18 + 16\sqrt{\ln \ln(2T) + \ln \frac{5.2}{\delta}}}{\beta}, 16 \right)$$

*Proof.* We will make use of Lemmas 8 and 9. We identify  $\epsilon_t = \widehat{\nabla}_{\mathbf{v}} J_D(\mathbf{v}_t) - \mathbb{E} \left[ \widehat{\nabla}_{\mathbf{v}} J_D(\mathbf{v}_t) \mid \widehat{\mathbf{B}}^{\mathbf{v}_t}(n(t)) \right]$  and  $\mathbf{b}_t = \nabla_{\mathbf{v}} J_D(\mathbf{v}_t) - \mathbb{E} \left[ \widehat{\nabla}_{\mathbf{v}_t} J_D(\mathbf{v}_t) \mid \widehat{\mathbf{B}}^{\mathbf{v}_t}(n(t)) \right]$ . As a consequence of Cauchy-Schwartz and Lemma 8 we see that if  $n(t)$  is such that:

$$\frac{n(t)}{\ln \ln(2n(t))} \geq \frac{120 \left( \ln \frac{83.2|\mathcal{S}||\mathcal{A}|t^2}{\delta} + 1 \right)}{\beta \xi_t^2} \max(280\eta^2\gamma^2 \|\mathbf{v}_t\|_\infty^2, 1)$$

Then for all  $t$  with probability at least  $1 - \frac{\delta}{2t^2}$  the bounds in Equations 31, 32, and 33 in Lemma 8 hold and therefore:

$$|\langle \epsilon_t, \mathbf{v}_t - \mathbf{v}_* \rangle| \leq \|\mathbf{v}_t - \mathbf{v}_*\|_\infty \|\epsilon_t\|_1 \leq \frac{1}{1-\gamma} \left( 1 + \frac{\log \frac{|\mathcal{S}||\mathcal{A}|}{\beta\rho}}{\eta} \right) \frac{4}{\beta} (1 + \frac{\xi_t}{\beta}) \stackrel{(i)}{\leq} \underbrace{\frac{1}{1-\gamma} \left( 1 + \frac{\log \frac{|\mathcal{S}||\mathcal{A}|}{\beta\rho}}{\eta} \right)}_{:=U_1} \frac{8}{\beta}.$$

Where inequality (i) holds by the assumption  $\xi_t \leq \beta$ . Notice that  $X_t = \langle \epsilon_t, \mathbf{v}_t - \mathbf{v}_* \rangle$  is a martingale difference sequence. A simple application of Lemma 13 yields that with probability at least  $1 - \delta$  for all  $t \in \mathbb{N}$ :

$$-\sum_{t=1}^T \langle \epsilon_t, \mathbf{x}_t - \mathbf{x}_* \rangle \leq 2U_1 \sqrt{t \left( \ln \frac{2t^2}{\delta} \right)} \quad (36)$$

Similarly observe that for all  $t$  with probability at least  $1 - \frac{\delta}{2t^2}$ , since the bounds in Equations 31, 32, and 33 in Lemma 8 hold,

$$\|\mathbf{b}_t\|_1 = \left\| \nabla_{\mathbf{v}} J_D(\mathbf{v}_t) - \mathbb{E} \left[ \widehat{\nabla}_{\mathbf{v}_t} J_D(\mathbf{v}_t) \mid \widehat{\mathbf{B}}^{\mathbf{v}_t}(n(t)) \right] \right\|_1 \leq 2(1 + \gamma) \xi_t (1 + \frac{\xi_t}{\beta}) \quad (37)$$

Notice that similarly and for all  $t$  with probability at least  $1 - \frac{\delta}{2t^2}$ , since the bounds in Equations 31, 32, and 33 in Lemma 8 hold:

$$\|\epsilon_t\|_2^2 \leq \frac{16}{\beta^2} \left( 1 + \frac{\xi_t}{\beta} \right)^2, \quad \text{and} \quad \|\mathbf{b}_t\|_2^2 \leq 4(1 + \gamma)^2 \xi_t^2 (1 + \frac{\xi_t}{\beta})^2$$

Finally we show a bound on the  $l_2$  norm of the gradient of  $J_D$ . Since  $\mathbf{v}_* \in \mathcal{D} = \left\{ \mathbf{v} \text{ s.t. } \|\mathbf{v}\|_\infty \leq \frac{1}{1-\gamma} \left( 1 + \frac{\log \frac{|\mathcal{S}||\mathcal{A}|}{\beta\rho}}{\eta} \right) \right\}$ . Recall that by Lemma 3 we have that  $J_D$  is  $(|\mathcal{S}| + 1)\eta$ -smooth in the  $\|\cdot\|_\infty$  norm. Therefore by Lemma 12:

$$\|\nabla J_D(\mathbf{v}_t)\|_1 \leq (|\mathcal{S}| + 1) \frac{\eta}{1 - \gamma} \left( 1 + \frac{\log \frac{|\mathcal{S}||\mathcal{A}|}{\beta\rho}}{\eta} \right)$$

Since  $\|\nabla J_D(\mathbf{v}_t)\|_2 \leq \|\nabla J_D(\mathbf{v}_t)\|_1$  this in turn implies that:

$$\|\nabla J_D(\mathbf{v}_t)\|_2^2 \leq (|\mathcal{S}| + 1)^2 \frac{\eta^2}{(1 - \gamma)^2} \left( 1 + \frac{\log \frac{|\mathcal{S}||\mathcal{A}|}{\beta\rho}}{\eta} \right)^2.$$

We now invoke the guarantees of Lemma 9 to show that with probability  $1 - 2\delta$  and simultaneously for all  $T \in \mathbb{N}$ :

$$\begin{aligned} \sum_{t=1}^T J_D(\mathbf{v}_t) - J_D(\mathbf{v}_*) &\leq \sum_{t=1}^T \frac{\|\mathbf{v}_t - \mathbf{v}_*\|^2 - \|\mathbf{v}_{t+1} - \mathbf{v}_*\|^2}{2\tau_t} + \\ &\tau_t \left( 2(|\mathcal{S}| + 1)^2 \frac{\eta^2}{(1 - \gamma)^2} \left( 1 + \frac{\log \frac{|\mathcal{S}||\mathcal{A}|}{\beta\rho}}{\eta} \right)^2 + \frac{80}{\beta^2} \left( 1 + \frac{\xi_t}{\beta} \right)^2 + 20(1 + \gamma)^2 \xi_t^2 \left( 1 + \frac{\xi_t}{\beta} \right)^2 \right) + \\ &2(1 + \gamma) \xi_t \left( 1 + \frac{\xi_t}{\beta} \right) \times \frac{1}{1 - \gamma} \left( 1 + \frac{\log \frac{|\mathcal{S}||\mathcal{A}|}{\beta\rho}}{\eta} \right) + 2U_1 \sqrt{T \left( \ln \frac{2t^2}{\delta} \right)} \\ &\stackrel{(i)}{\leq} \sum_{t=1}^T \frac{\|\mathbf{v}_t - \mathbf{v}_*\|^2 - \|\mathbf{v}_{t+1} - \mathbf{v}_*\|^2}{2\tau_t} + \tau_t \left( 2(|\mathcal{S}| + 1)^2 \eta^2 D^2 + \frac{320}{\beta^2} + 240 \right) + 8D\xi_t + \\ &2U_1 \sqrt{T \left( \ln \frac{2t^2}{\delta} \right)} \end{aligned}$$

Recall that  $U_1 = \frac{1}{1 - \gamma} \left( 1 + \frac{\log \frac{|\mathcal{S}||\mathcal{A}|}{\beta\rho}}{\eta} \right) \frac{8}{\beta} = \frac{8D}{\beta}$  and where  $D = \frac{1}{1 - \gamma} \left( 1 + \frac{\log \frac{|\mathcal{S}||\mathcal{A}|}{\beta\rho}}{\eta} \right)$ . Inequality (i) holds because  $\xi_t \leq \beta$  and because  $\gamma \leq 1$ . Let  $\tau_t = \frac{c}{\sqrt{t}}$  for some constant to be specified later and let's analyze the terms in the sum above that depend on these  $\tau_t$  values:

$$\begin{aligned} \sum_{t=1}^T \frac{\|\mathbf{v}_t - \mathbf{v}_*\|^2 - \|\mathbf{v}_{t+1} - \mathbf{v}_*\|^2}{2\tau_t} &= -\frac{\|\mathbf{v}_{T+1} - \mathbf{v}_*\|^2}{2\tau_T} + \frac{1}{2c} \sum_{t=1}^T \|\mathbf{v}_t - \mathbf{v}_*\|^2 \left( \sqrt{t} - \sqrt{t-1} \right) \\ &\leq \frac{D^2}{2c} \sqrt{T} \end{aligned}$$

The second term can be bounded as:

$$\sum_{t=1}^T \tau_t c' = c' \sum_{t=1}^T \frac{1}{\sqrt{t}} \leq c' 2\sqrt{T}$$

Where  $c' = 2(|\mathcal{S}| + 1)^2 \eta^2 D^2 + \frac{320}{\beta^2} + 240$ . Therefore under this assumption we obtain:

$$\sum_{t=1}^T J_D(\mathbf{v}_t) - J_D(\mathbf{v}_*) \leq \frac{D^2}{2c} \sqrt{T} + c' 2\sqrt{T} + 8D \left( \sum_{t=1}^T \xi_t \right) + 2U_1 \sqrt{T \left( \ln \frac{2t^2}{\delta} \right)}.$$

The minimizing choice for  $c$  equals  $c = \frac{D}{2\sqrt{c'}}$ . And in this case:

$$\sum_{t=1}^T J_D(\mathbf{v}_t) - J_D(\mathbf{v}_\star) \leq 2D\sqrt{c'T} + 8D \left( \sum_{t=1}^T \xi_t \right) + 2U_1 \sqrt{T \left( \ln \frac{2t^2}{\delta} \right)}$$

If we set  $\xi_t = \min(\sqrt{\frac{c'}{t}}, \beta)$  we get:

$$\begin{aligned} \sum_{t=1}^T J_D(\mathbf{v}_t) - J_D(\mathbf{v}_\star) &\leq 18D\sqrt{c'T} + 2U_1 \sqrt{T \left( \ln \frac{2t^2}{\delta} \right)} \\ &\stackrel{(i)}{\leq} 36D \max \left( (|\mathcal{S}| + 1) \eta D, \frac{18}{\beta}, 16 \right) \sqrt{T} + 2U_1 \sqrt{T \left( \ln \frac{2t^2}{\delta} \right)} \\ &\leq 36D \max \left( (|\mathcal{S}| + 1) \eta D, \frac{18 + 16\sqrt{\ln \ln(2T) + \ln \frac{5.2}{\delta}}}{\beta}, 16 \right) \sqrt{T} \end{aligned}$$

Inequality (i) holds because  $\sqrt{c'} \leq 2 \max \left( (|\mathcal{S}| + 1) \eta D, \frac{18}{\beta}, 16 \right)$ .

We conclude that:

$$\begin{aligned} J_D \left( \frac{1}{T} \sum_{t=1}^T \mathbf{v}_t \right) &\stackrel{(i)}{\leq} \frac{1}{T} \sum_{t=1}^T J_D(\mathbf{v}_t) \\ &\leq J_D(\mathbf{v}_\star) + \frac{36D}{\sqrt{T}} \max \left( (|\mathcal{S}| + 1) \eta D, \frac{18 + 16\sqrt{\ln \ln(2T) + \ln \frac{5.2}{\delta}}}{\beta}, 16 \right) \end{aligned}$$

Inequality (i) holds by convexity of  $J_D$ . The result follows.  $\square$

We are ready to present the proof of Lemma [10](#) which corresponds to a simplified version of Lemma [19](#).

### H.3 Proof of Lemma [10](#)

**Lemma 10.** *We assume  $\eta \geq \frac{4}{\beta}$ . Set  $\xi_t = \frac{8|\mathcal{S}|\eta D}{\sqrt{t}}$  and  $\tau_t = \frac{1}{16|\mathcal{S}|\eta\sqrt{t}}$ . If we take  $t$  gradient steps using  $n(t)$  samples from  $\mathbf{q} \times \mathbf{P}$  (possibly reusing the samples for multiple gradient computations) with  $n(t)$  satisfying  $n(t) \geq \frac{525t \left( \ln \frac{100|\mathcal{S}||\mathcal{A}|t^2}{\delta} + 1 \right)^3}{\beta|\mathcal{S}|^2}$ . Then for all  $t \geq 1$  we have that with probability at least  $1 - 3\delta$  and simultaneously for all  $t \in \mathbb{N}$  such that  $t \geq \frac{64|\mathcal{S}|^2\eta^2 D^2}{\beta}$ :*

$$J_D \left( \frac{1}{t} \sum_{\ell=1}^t \mathbf{v}_\ell \right) \leq J_D(\mathbf{v}_\star) + \tilde{\mathcal{O}} \left( \frac{D^2 |\mathcal{S}| \eta}{\sqrt{t}} \right).$$

*Proof.* First note that the  $c'$  of Lemma [19](#) satisfies  $c' = \max \left( 2(|\mathcal{S}| + 1)^2 \eta^2 D^2, \frac{320}{\beta^2}, 240 \right)$  and therefore:

$$c' \leq 8 \max \left( 8|\mathcal{S}|^2 \eta^2 D^2, \frac{320}{\beta} \right)$$

Thus  $\sqrt{c'} = \max(8|\mathcal{S}|\eta D, \frac{31}{\beta}) = 8|\mathcal{S}|\eta D$  (the last equality holds because  $\eta \geq \frac{4}{\beta}$ ) and therefore:

$$\xi_t = \min \left( \frac{8|\mathcal{S}|\eta D}{\sqrt{t}}, \beta \right) = \frac{8|\mathcal{S}|\eta D}{\sqrt{t}}$$

The last equality holds because  $t \geq \frac{64|\mathcal{S}|^2\eta^2 D^2}{\beta}$ .

Then the condition in Equation 35 of Lemma 19 is satisfied whenever:

$$\frac{n(t)}{\ln \ln(2n(t))} \geq \frac{120t \times 280\eta^2 D^2 \left( \ln \frac{100|\mathcal{S}||\mathcal{A}|t^2}{\delta} + 1 \right)}{\beta 64|\mathcal{S}|^2\eta^2 D^2} = \frac{525t \left( \ln \frac{100|\mathcal{S}||\mathcal{A}|t^2}{\delta} + 1 \right)}{\beta|\mathcal{S}|^2} \quad (38)$$

And therefore if we set  $n(t) = \frac{525t \left( \ln \frac{100|\mathcal{S}||\mathcal{A}|t^2}{\delta} + 1 \right)^3}{\beta|\mathcal{S}|^2} \geq \frac{525t \ln \ln(2t) \left( \ln \frac{100|\mathcal{S}||\mathcal{A}|t^2}{\delta} + 1 \right)}{\beta|\mathcal{S}|^2} \ln \left( \frac{2t^2}{\delta} \right)$  we see that with probability at least  $1 - 3\delta$  and simultaneously for all  $t \in \mathbb{N}$ :

$$\begin{aligned} J_D \left( \frac{1}{t} \sum_{\ell=1}^t \mathbf{v}_\ell \right) &\leq J_D(\mathbf{v}_*) + \frac{36D}{\sqrt{t}} \max \left( (|\mathcal{S}| + 1) \eta D, \frac{18 + 16\sqrt{\ln \ln(2t) + \ln \frac{5.2}{\delta}}}{\beta}, 16 \right) \\ &= J_D(\mathbf{v}_*) + \frac{72D^2|\mathcal{S}|\eta}{\sqrt{t}} \left( 5 + 4\sqrt{\ln \ln(2t) + \ln \frac{5.2}{\delta}} \right) \end{aligned}$$

The last inequality holds since  $\eta \geq \frac{4}{\beta}$ . This implies that using a budget of  $n(t)$  samples where  $n(t)$  satisfies Inequality 38 we can take  $t$  gradient steps.  $\square$

## I Extended Results for Tsallis Entropy Regularizers

For  $\alpha > 1$  recall the Tsallis entropy between distributions  $\mathbf{q}, \boldsymbol{\lambda}$  equals:

$$\begin{aligned} D_\alpha^\mathcal{T}(\boldsymbol{\lambda} \parallel \mathbf{q}) &= \frac{1}{\alpha - 1} \left( \mathbb{E}_{(s,a) \sim \mathbf{q}} \left[ \left( \frac{\lambda_{s,a}}{\mathbf{q}_{s,a}} \right)^\alpha - 1 \right] \right) \\ &= \frac{1}{\alpha - 1} \left( \mathbb{E}_{(s,a) \sim \boldsymbol{\lambda}} \left[ \left( \frac{\lambda_{s,a}}{\mathbf{q}_{s,a}} \right)^{\alpha-1} - 1 \right] \right) \end{aligned}$$

Let  $F(\boldsymbol{\lambda}) = \frac{1}{\eta} D_\alpha^\mathcal{T}(\boldsymbol{\lambda} \parallel \mathbf{q})$ . The Fenchel Dual of a Tsallis Entropy satisfies:

$$F^*(\mathbf{u}) = \left\langle \boldsymbol{\lambda}(\mathbf{u}), \mathbf{u} - \frac{(\mathbf{u} + x_* \mathbf{1})}{\alpha} \boldsymbol{\lambda}(\mathbf{u})^{\alpha-1} + \frac{1}{\eta(\alpha-1)} \mathbf{1} \right\rangle$$

Where  $\boldsymbol{\lambda}(\mathbf{u}) = (\eta \mathbf{u} + \eta x_* \mathbf{1})^{1/(\alpha-1)} \left( \frac{\alpha-1}{\alpha} \right)^{1/(\alpha-1)} \mathbf{q}$  and where  $x_* \in \mathbb{R}$  such that  $\sum_{s,a} \lambda_{s,a}(\mathbf{u}) = 1$  and  $\lambda_{s,a}(\mathbf{u}) \geq 0$  for all  $s, a \in \mathcal{S} \times \mathcal{A}$ . This implies that:

$$J_D^{\mathcal{T},\alpha}(\mathbf{v}) = (1 - \gamma) \sum_s \mathbf{v}_s \mu_s + \left\langle \boldsymbol{\lambda}(\mathbf{A}^\mathbf{v}), \mathbf{A}^\mathbf{v} - \frac{(\mathbf{A}^\mathbf{v} + x_* \mathbf{1})}{\alpha} \boldsymbol{\lambda}(\mathbf{A}^\mathbf{v})^{\alpha-1} + \frac{1}{\eta(\alpha-1)} \mathbf{1} \right\rangle$$

### I.0.1 Strong Convexity of Tsallis Entropy

In this section we show that whenever  $\alpha \in (1, 2]$ , the Tsallis entropy is a strongly convex function of  $\boldsymbol{\lambda}$  in the  $\|\cdot\|_2$  norm,

**Lemma 20.** *If  $\alpha \in (1, 2]$ , the function  $F(\boldsymbol{\lambda}) = \frac{1}{\eta} D_\alpha^\mathcal{T}(\boldsymbol{\lambda} \parallel \mathbf{q})$  is  $\frac{\alpha}{\eta}$ -strongly convex in the  $\|\cdot\|_2$  norm.*

*Proof.* It is easy to see that  $\nabla_\lambda^2 D_\alpha^\mathcal{T}(\boldsymbol{\lambda} \parallel \mathbf{q})$  is a diagonal matrix satisfying:

$$[\nabla_\lambda^2 D_\alpha^\mathcal{T}(\boldsymbol{\lambda} \parallel \mathbf{q})]_{s,a} = \frac{\alpha \lambda_{s,a}^{\alpha-2}}{\eta \mathbf{q}_{s,a}^{\alpha-1}}.$$

Whenever  $\alpha \leq 2$ , and noting that  $\mathbf{q} \in [0, 1]$  we conclude that any of these terms must be lower bounded by  $\frac{\alpha}{\eta}$ . The result follows.  $\square$

### I.1 Tsallis entropy version of Lemma 4

**Lemma 21.** *Let  $\tilde{\mathbf{v}} \in \mathbb{R}^{|\mathcal{S}|}$  be arbitrary and let  $\tilde{\boldsymbol{\lambda}}$  be its corresponding candidate primal variable (i.e.  $\tilde{\boldsymbol{\lambda}} = \boldsymbol{\lambda}(\mathbf{A}^{\mathbf{v}})$ ). If  $\|\nabla_{\mathbf{v}} J_D(\tilde{\mathbf{v}})\|_1 \leq \epsilon$  and Assumptions 3 and 2 hold then whenever  $|\mathcal{S}| \geq 2$ :*

$$J_P^{\mathcal{T}, \alpha}(\boldsymbol{\lambda}^{\tilde{\pi}}) \geq J_P^{\mathcal{T}, \alpha}(\boldsymbol{\lambda}^*) - \epsilon \left( \frac{1+c}{1-\gamma} + \|\tilde{\mathbf{v}}\|_{\infty} \right)$$

Where  $c = \frac{1}{\eta(\alpha-1)} \frac{1}{\beta^{\alpha-1}} \left( \max(\alpha-1, \frac{2}{\rho^{\alpha-1}}) + 2 \right)$  and  $\boldsymbol{\lambda}^*$  is the  $J_P$  optimum.

*Proof.* For any  $\boldsymbol{\lambda}$  and  $\mathbf{v}$  let the lagrangian  $J_L(\boldsymbol{\lambda}, \mathbf{v})$  be defined as,

$$J_L(\boldsymbol{\lambda}, \mathbf{v}) = (1-\gamma)\langle \boldsymbol{\mu}, \mathbf{v} \rangle + \left\langle \boldsymbol{\lambda}, \mathbf{A}^{\mathbf{v}} - \frac{1}{\eta(\alpha-1)} \left( \left( \frac{\boldsymbol{\lambda}}{\mathbf{q}} \right)^{\alpha-1} - 1 \right) \right\rangle$$

Note that  $J_D(\tilde{\mathbf{v}}) = J_L(\tilde{\boldsymbol{\lambda}}, \tilde{\mathbf{v}})$  and that in fact  $J_L$  is linear in  $\bar{\mathbf{v}}$ ; i.e.,

$$J_L(\tilde{\boldsymbol{\lambda}}, \bar{\mathbf{v}}) = J_L(\tilde{\boldsymbol{\lambda}}, \tilde{\mathbf{v}}) + \langle \nabla_{\mathbf{v}} J_L(\tilde{\boldsymbol{\lambda}}, \tilde{\mathbf{v}}), \bar{\mathbf{v}} - \tilde{\mathbf{v}} \rangle.$$

Using Holder's inequality we have:

$$J_L(\tilde{\boldsymbol{\lambda}}, \bar{\mathbf{v}}) \geq J_L(\tilde{\boldsymbol{\lambda}}, \tilde{\mathbf{v}}) - \|\nabla_{\mathbf{v}} J_L(\tilde{\boldsymbol{\lambda}}, \tilde{\mathbf{v}})\|_1 \cdot \|\bar{\mathbf{v}} - \tilde{\mathbf{v}}\|_{\infty} = J_D(\tilde{\mathbf{v}}) - \|\nabla_{\mathbf{v}} J_L(\tilde{\boldsymbol{\lambda}}, \tilde{\mathbf{v}})\|_1 \cdot \|\bar{\mathbf{v}} - \tilde{\mathbf{v}}\|_{\infty}.$$

Let  $\boldsymbol{\lambda}_*$  be the candidate primal solution to the optimal dual solution  $\mathbf{v}_* = \arg \min_{\mathbf{v}} J_D(\mathbf{v})$ . By weak duality we have that  $J_D(\tilde{\mathbf{v}}) \geq J_P(\boldsymbol{\lambda}^*) = J_D(\mathbf{v}_*)$ , and since by assumption  $\|\nabla_{\mathbf{v}} J_L(\tilde{\boldsymbol{\lambda}}, \tilde{\mathbf{v}})\|_1 \leq \epsilon$ :

$$J_L(\tilde{\boldsymbol{\lambda}}, \bar{\mathbf{v}}) \geq J_P(\boldsymbol{\lambda}^*) - \epsilon \|\bar{\mathbf{v}} - \tilde{\mathbf{v}}\|_{\infty}. \quad (39)$$

In order to use this inequality to lower bound the value of  $J_P(\boldsymbol{\lambda}^{\tilde{\pi}})$ , we will need to choose an appropriate  $\bar{\mathbf{v}}$  such that the LHS reduces to  $J_P(\boldsymbol{\lambda}^{\tilde{\pi}})$  while keeping the  $\ell_{\infty}$  norm on the RHS small. Thus we consider setting  $\bar{\mathbf{v}}$  as:

$$\bar{\mathbf{v}}_s = \mathbb{E}_{a, s' \sim \tilde{\pi} \times \mathcal{T}} \left[ \mathbf{z}_s + \mathbf{r}_{s,a} - \frac{1}{\eta(\alpha-1)} \left( \left( \frac{\boldsymbol{\lambda}_{s,a}^{\tilde{\pi}}}{\mathbf{q}_{s,a}} \right)^{\alpha-1} - 1 \right) + \gamma \bar{\mathbf{v}}_{s'} \right]$$

Where  $\mathbf{z} \in \mathbb{R}^{|\mathcal{S}|}$  is some function to be determined later. It is clear that an appropriate  $\mathbf{z}$  exists as long as  $\mathbf{z}, \mathbf{r}, \frac{1}{\eta(\alpha-1)} \left( \left( \frac{\boldsymbol{\lambda}_{s,a}^{\tilde{\pi}}}{\mathbf{q}_{s,a}} \right)^{\alpha-1} - 1 \right)$  are uniformly bounded. Furthermore:

$$\|\bar{\mathbf{v}}\|_{\infty} \leq \frac{\max_{s,a} \left| \mathbf{z}_s + \mathbf{r}_{s,a} - \frac{1}{\eta(\alpha-1)} \left( \left( \frac{\boldsymbol{\lambda}_{s,a}^{\tilde{\pi}}}{\mathbf{q}_{s,a}} \right)^{\alpha-1} - 1 \right) \right|}{1-\gamma} \leq \frac{\|\mathbf{z}\|_{\infty} + \|\mathbf{r}\|_{\infty} + \frac{1}{\eta(\alpha-1)} \left\| \left( \frac{\boldsymbol{\lambda}_{s,a}^{\tilde{\pi}}}{\mathbf{q}_{s,a}} \right)^{\alpha-1} - 1 \right\|_{\infty}}{1-\gamma} \quad (40)$$

We proceed to bound the norm of  $\left\| \left( \frac{\boldsymbol{\lambda}_{s,a}^{\tilde{\pi}}}{\mathbf{q}_{s,a}} \right)^{\alpha-1} - 1 \right\|_{\infty}$ . Observe that by Assumptions 2 and 3, for all states  $s, a \in \mathcal{S} \times \mathcal{A}$ , the ratio  $\left| \frac{\boldsymbol{\lambda}_{s,a}^{\tilde{\pi}}}{\mathbf{q}_{s,a}} \right| \leq \frac{1}{\beta}$  and therefore:

$$\left\| \left( \frac{\boldsymbol{\lambda}_{s,a}^{\tilde{\pi}}}{\mathbf{q}_{s,a}} \right)^{\alpha-1} - 1 \right\|_{\infty} \leq 1 + \frac{1}{\beta^{\alpha-1}}$$

Notice the following relationships hold:

$$\begin{aligned}
\left\langle \tilde{\boldsymbol{\lambda}}, \mathbf{A}^{\bar{\mathbf{v}}} - \frac{1}{\eta(\alpha-1)} \left( \left( \frac{\tilde{\boldsymbol{\lambda}}}{\mathbf{q}} \right)^{\alpha-1} - 1 \right) \right\rangle &= \sum_s \tilde{\boldsymbol{\lambda}}_s \left( \mathbb{E}_{a,s' \sim \tilde{\pi} \times \mathbf{P}} \left[ \mathbf{r}_{s,a} + \gamma \bar{\mathbf{v}}_{s'} - \bar{\mathbf{v}}_s - \frac{1}{\eta(\alpha-1)} \left( \left( \frac{\tilde{\boldsymbol{\lambda}}_{s,a}}{\mathbf{q}_{s,a}} \right)^{\alpha-1} - 1 \right) \right] \right) \\
&= \sum_s \tilde{\boldsymbol{\lambda}}_s \left( \mathbb{E}_{a,s' \sim \tilde{\pi} \times \mathbf{P}} \left[ \frac{1}{\eta(\alpha-1)} \left( \left( \frac{\boldsymbol{\lambda}_{s,a}^{\tilde{\pi}}}{\mathbf{q}_{s,a}} \right)^{\alpha-1} - 1 \right) - \frac{1}{\eta(\alpha-1)} \left( \left( \frac{\tilde{\boldsymbol{\lambda}}_{s,a}}{\mathbf{q}_{s,a}} \right)^{\alpha-1} - 1 \right) \right] \right) \\
&= \sum_s \tilde{\boldsymbol{\lambda}}_s \left( \mathbb{E}_{a,s' \sim \tilde{\pi} \times \mathbf{P}} \left[ \frac{1}{\eta(\alpha-1)} \left( \frac{\boldsymbol{\lambda}_{s,a}^{\tilde{\pi}}}{\mathbf{q}_{s,a}} \right)^{\alpha-1} - \frac{1}{\eta(\alpha-1)} \left( \frac{\tilde{\boldsymbol{\lambda}}_{s,a}}{\mathbf{q}_{s,a}} \right)^{\alpha-1} - \mathbf{z}_s \right] \right) \\
&= \sum_s \tilde{\boldsymbol{\lambda}}_s \left( \frac{1}{\eta(\alpha-1)} \left( \left( \frac{\boldsymbol{\lambda}_s^{\tilde{\pi}}}{\mathbf{q}_s} \right)^{\alpha-1} - \left( \frac{\tilde{\boldsymbol{\lambda}}_s}{\mathbf{q}_s} \right)^{\alpha-1} \right) \left[ \sum_a \frac{\tilde{\pi}^\alpha(a|s)}{\mathbf{q}_{a|s}^{\alpha-1}} \right] - \mathbf{z}_s \right) \tag{41}
\end{aligned}$$

Where  $\tilde{\boldsymbol{\lambda}}_s = \sum_a \tilde{\boldsymbol{\lambda}}_{s,a}$  and  $\boldsymbol{\lambda}_s^{\tilde{\pi}} = \sum_a \boldsymbol{\lambda}_{s,a}^{\tilde{\pi}}$ . Note that by definition:

$$(1-\gamma)\langle \boldsymbol{\mu}, \bar{\mathbf{v}} \rangle = \left\langle \boldsymbol{\lambda}^{\tilde{\pi}}, \mathbf{z} + \mathbf{r} - \frac{1}{\eta(\alpha-1)} \left( \left( \frac{\boldsymbol{\lambda}^{\tilde{\pi}}}{\mathbf{q}} \right)^{\alpha-1} - 1 \right) \right\rangle = J_P(\boldsymbol{\lambda}^{\tilde{\pi}}) + \langle \boldsymbol{\lambda}^{\tilde{\pi}}, \mathbf{z} \rangle. \tag{42}$$

Let's expand the definition of  $J_L(\tilde{\boldsymbol{\lambda}}, \bar{\mathbf{v}})$  using Equations [11](#) and [12](#):

$$\begin{aligned}
J_L(\tilde{\boldsymbol{\lambda}}, \bar{\mathbf{v}}) &= (1-\gamma)\langle \boldsymbol{\mu}, \bar{\mathbf{v}} \rangle + \left\langle \tilde{\boldsymbol{\lambda}}, \mathbf{A}^{\bar{\mathbf{v}}} - \frac{1}{\eta(\alpha-1)} \left( \left( \frac{\tilde{\boldsymbol{\lambda}}}{\mathbf{q}} \right)^{\alpha-1} - 1 \right) \right\rangle \\
&= J_P(\boldsymbol{\lambda}^{\tilde{\pi}}) + \langle \boldsymbol{\lambda}^{\tilde{\pi}}, \mathbf{z} \rangle + \sum_s \tilde{\boldsymbol{\lambda}}_s \left( \frac{1}{\eta(\alpha-1)} \left( \left( \frac{\boldsymbol{\lambda}_s^{\tilde{\pi}}}{\mathbf{q}_s} \right)^{\alpha-1} - \left( \frac{\tilde{\boldsymbol{\lambda}}_s}{\mathbf{q}_s} \right)^{\alpha-1} \right) \left[ \sum_a \frac{\tilde{\pi}^\alpha(a|s)}{\mathbf{q}_{a|s}^{\alpha-1}} \right] - \mathbf{z}_s \right) \\
&= J_P(\boldsymbol{\lambda}^{\tilde{\pi}}) + \sum_s \left( \mathbf{z}_s (\boldsymbol{\lambda}_s^{\tilde{\pi}} - \tilde{\boldsymbol{\lambda}}_s) + \frac{\tilde{\boldsymbol{\lambda}}_s}{\eta(\alpha-1)} \left( \left( \frac{\boldsymbol{\lambda}_s^{\tilde{\pi}}}{\mathbf{q}_s} \right)^{\alpha-1} - \left( \frac{\tilde{\boldsymbol{\lambda}}_s}{\mathbf{q}_s} \right)^{\alpha-1} \right) \left[ \sum_a \frac{\tilde{\pi}^\alpha(a|s)}{\mathbf{q}_{a|s}^{\alpha-1}} \right] \right)
\end{aligned}$$

Since we want this expression to equal  $J_P(\boldsymbol{\lambda}^{\tilde{\pi}})$ , we need to choose  $\mathbf{z}$  such that:

$$\mathbf{z}_s = \frac{\frac{1}{\eta(\alpha-1)} \left( \left( \frac{\boldsymbol{\lambda}_s^{\tilde{\pi}}}{\mathbf{q}_s} \right)^{\alpha-1} - \left( \frac{\tilde{\boldsymbol{\lambda}}_s}{\mathbf{q}_s} \right)^{\alpha-1} \right) \left[ \sum_a \frac{\tilde{\pi}^\alpha(a|s)}{\mathbf{q}_{a|s}^{\alpha-1}} \right]}{1 - \frac{\boldsymbol{\lambda}_s^{\tilde{\pi}}}{\tilde{\boldsymbol{\lambda}}_s}}$$

Observe that  $\mathbf{z}_s = \frac{\frac{1}{\eta(\alpha-1)} \left( (\boldsymbol{\lambda}_s^{\tilde{\pi}})^{\alpha-1} - (\tilde{\boldsymbol{\lambda}}_s)^{\alpha-1} \right) \left[ \sum_a \frac{\tilde{\pi}^\alpha(a|s)}{\mathbf{q}_{s,a}^{\alpha-1}} \right]}{1 - \frac{\boldsymbol{\lambda}_s^{\tilde{\pi}}}{\tilde{\boldsymbol{\lambda}}_s}}$  and therefore, since for all  $s$  and when

$\alpha \geq 1$  by Assumption [2](#) we have that  $\sum_a \frac{\tilde{\pi}^\alpha(a|s)}{\mathbf{q}_{s,a}^{\alpha-1}} \leq \frac{1}{\beta^{\alpha-1}}$ ,

$$|\mathbf{z}_s| \leq \frac{1}{\eta(\alpha-1)} \frac{1}{\beta^{\alpha-1}} \frac{\left| (\boldsymbol{\lambda}_s^{\tilde{\pi}})^{\alpha-1} - \tilde{\boldsymbol{\lambda}}_s^{\alpha-1} \right|}{\left| 1 - \frac{\boldsymbol{\lambda}_s^{\tilde{\pi}}}{\tilde{\boldsymbol{\lambda}}_s} \right|}$$

Let  $\frac{\boldsymbol{\lambda}_s^{\tilde{\pi}}}{\tilde{\boldsymbol{\lambda}}_s} = \frac{1}{\theta}$  where  $\theta \in [0, \frac{1}{\rho}]$ . Then,

$$|\mathbf{z}_s| \leq \frac{1}{\eta(\alpha-1)\beta^{\alpha-1}} \boldsymbol{\lambda}_s^{\tilde{\pi}} \frac{|1 - \theta^{\alpha-1}|}{\left| 1 - \frac{1}{\theta} \right|}$$

It is easy to see that when  $\alpha \geq 0$  the function  $f(\theta) = \frac{1-\theta^{\alpha-1}}{1-\frac{1}{\theta}} = \frac{\theta-\theta^\alpha}{\theta-1}$  is decreasing in the interval  $(0, 1]$  and increasing afterwards. Furthermore, by L'Hopital's rule,  $f(1) = 1 - \alpha$  and  $f(\frac{1}{\rho}) = \frac{\frac{1}{\rho^\alpha} - \frac{1}{\rho}}{\frac{1}{\rho} - 1} \leq \frac{2}{\rho^{\alpha-1}}$  since  $\rho \leq \frac{1}{2}$ . This implies,

$$|\mathbf{z}_s| \leq \frac{1}{\eta(\alpha-1)} \frac{1}{\beta^{\alpha-1}} \max(\alpha-1, \frac{2}{\rho^{\alpha-1}}).$$

And therefore Equation 40 implies:

$$\|\tilde{\mathbf{v}}\|_\infty \leq \frac{\frac{1}{\eta(\alpha-1)} \frac{1}{\beta^{\alpha-1}} \max(\alpha-1, \frac{2}{\rho^{\alpha-1}}) + 1 + \frac{1}{\eta(\alpha-1)} \left( \frac{1}{\beta^{\alpha-1}} + 1 \right)}{1-\gamma} = \frac{\frac{1}{\eta(\alpha-1)} \frac{1}{\beta^{\alpha-1}} \left( \max(\alpha-1, \frac{2}{\rho^{\alpha-1}}) + 2 \right) + 1}{1-\gamma}$$

Putting these together we obtain the following version of equation 39:

$$J_L(\tilde{\boldsymbol{\lambda}}, \tilde{\mathbf{v}}) \geq J_P(\boldsymbol{\lambda}^*) - \epsilon \left( \frac{\frac{1}{\eta(\alpha-1)} \frac{1}{\beta^{\alpha-1}} \left( \max(\alpha-1, \frac{2}{\rho^{\alpha-1}}) + 2 \right) + 1}{1-\gamma} + \|\tilde{\mathbf{v}}\|_\infty \right)$$

□

## I.2 Extension of Lemma 5 to Tsallis Entropy

**Lemma 22.** Under Assumptions 1, 2 and 3 the optimal dual variables are bounded as

$$\|\mathbf{v}^*\|_\infty \leq \frac{1}{1-\gamma} \left( 1 + \frac{2}{\eta(\alpha-1)\beta^{\alpha-1}} \right) = D_{\mathcal{D},\alpha}. \quad (43)$$

*Proof.* Recall the Lagrangian form,

$$\min_{\mathbf{v}} \max_{\boldsymbol{\lambda}_{s,a} \in \Delta_{S \times A}} J_L(\boldsymbol{\lambda}, \mathbf{v}) := (1-\gamma)\langle \mathbf{v}, \boldsymbol{\mu} \rangle + \left\langle \boldsymbol{\lambda}, \mathbf{A}^{\mathbf{v}} - \frac{1}{\eta(\alpha-1)} \left( \left( \frac{\boldsymbol{\lambda}_{s,a}}{\mathbf{q}_{s,a}} \right)^{\alpha-1} - 1 \right) \right\rangle.$$

The KKT conditions of  $\boldsymbol{\lambda}^*, \mathbf{v}^*$  imply that for any  $s, a$ , either (1)  $\boldsymbol{\lambda}_{s,a}^* = 0$  and  $\frac{\partial}{\partial \boldsymbol{\lambda}_{s,a}} J_L(\boldsymbol{\lambda}^*, \mathbf{v}^*) \leq 0$  or (2)  $\frac{\partial}{\partial \boldsymbol{\lambda}_{s,a}} J_L(\boldsymbol{\lambda}^*, \mathbf{v}^*) = 0$ . The partial derivative of  $J_L$  is given by,

$$\frac{\partial}{\partial \boldsymbol{\lambda}_{s,a}} J_L(\boldsymbol{\lambda}^*, \mathbf{v}^*) = \mathbf{r}_{s,a} + \gamma \sum_{s'} P_a(s'|s) \mathbf{v}_{s'}^* - \mathbf{v}_s^* - \frac{\alpha}{\eta(\alpha-1)} \left( \frac{\boldsymbol{\lambda}_{s,a}^*}{\mathbf{q}_{s,a}} \right)^{\alpha-1} + \frac{1}{\eta(\alpha-1)}. \quad (44)$$

Thus, for any  $s, a$ , either

$$\boldsymbol{\lambda}_{s,a}^* = 0 \text{ and } \mathbf{v}_s^* \geq \mathbf{r}_{s,a} - \frac{\alpha}{\eta(\alpha-1)} \left( \frac{\boldsymbol{\lambda}_{s,a}^*}{\mathbf{q}_{s,a}} \right)^{\alpha-1} + \frac{1}{\eta(\alpha-1)} + \gamma \sum_{s'} P_a(s'|s) \mathbf{v}_{s'}^*, \quad (45)$$

or,

$$\boldsymbol{\lambda}_{s,a}^* > 0 \text{ and } \mathbf{v}_s^* = \mathbf{r}_{s,a} - \frac{\alpha}{\eta(\alpha-1)} \left( \frac{\boldsymbol{\lambda}_{s,a}^*}{\mathbf{q}_{s,a}} \right)^{\alpha-1} + \frac{1}{\eta(\alpha-1)} + \gamma \sum_{s'} P_a(s'|s) \mathbf{v}_{s'}^*. \quad (46)$$

Recall that  $\boldsymbol{\lambda}^*$  is the discounted state-action visitations of some policy  $\pi_*$ ; i.e.,  $\boldsymbol{\lambda}_{s,a}^* = \boldsymbol{\lambda}_s^{\pi_*} \cdot \pi_*(a|s)$  for some  $\pi_*$ . Note that by Assumption 3 any policy  $\pi$  has  $\boldsymbol{\lambda}_s^{\pi_*} > 0$  for all  $s$ . Accordingly, the KKT conditions imply,

$$\pi_*(a|s) = 0 \text{ and } \mathbf{v}_s^* \geq \mathbf{r}_{s,a} - \frac{\alpha}{\eta(\alpha-1)} \left( \frac{\boldsymbol{\lambda}_{s,a}^*}{\mathbf{q}_{s,a}} \right)^{\alpha-1} + \frac{1}{\eta(\alpha-1)} + \gamma \sum_{s'} P_a(s'|s) \mathbf{v}_{s'}^*, \quad (47)$$

or,

$$\pi_*(a|s) > 0 \text{ and } \mathbf{v}_s^* = \mathbf{r}_{s,a} - \frac{\alpha}{\eta(\alpha-1)} \left( \frac{\boldsymbol{\lambda}_{s,a}^*}{\mathbf{q}_{s,a}} \right)^{\alpha-1} + \frac{1}{\eta(\alpha-1)} + \gamma \sum_{s'} P_a(s'|s) \mathbf{v}_{s'}^*. \quad (48)$$



Equivalently,

$$\mathbf{v}_s^* = \mathbb{E}_{a \sim \pi_*(s)} \left[ \mathbf{r}_{s,a} - \frac{\alpha}{\eta(\alpha-1)} \left( \frac{\boldsymbol{\lambda}_{s,a}^*}{\mathbf{q}_{s,a}} \right)^{\alpha-1} + \frac{1}{\eta(\alpha-1)} + \gamma \sum_{s'} P_a(s'|s) \mathbf{v}_{s'}^* \right] \quad (49)$$

$$(50)$$

We may express these conditions as a Bellman recurrence for  $\mathbf{v}_s^*$  and the solution to these Bellman equations is bounded when  $\mathbf{r}_{s,a} - \frac{\alpha}{\eta(\alpha-1)} \left( \frac{\boldsymbol{\lambda}_{s,a}^*}{\mathbf{q}_{s,a}} \right)^{\alpha-1} + \frac{1}{\eta(\alpha-1)}$  is bounded [24]. And indeed, by Assumptions 2 and 1,  $\left| \mathbf{r}_{s,a} - \frac{\alpha}{\eta(\alpha-1)} \left( \frac{\boldsymbol{\lambda}_{s,a}^*}{\mathbf{q}_{s,a}} \right)^{\alpha-1} + \frac{1}{\eta(\alpha-1)} \right| \leq 1 + \frac{1}{\eta(\alpha-1)} + \frac{1}{\eta(\alpha-1)\beta^{\alpha-1}}$ . We may thus bound the solution as,

$$\|\mathbf{v}^*\|_\infty \leq \frac{1}{1-\gamma} \left( 1 + \frac{2}{\eta(\alpha-1)\beta^{\alpha-1}} \right). \quad (51)$$

□

### I.3 Gradient descent results for the Tsallis Entropy

**Remark 1.** Throughout this section we make the assumption that  $\alpha \in (1, 2]$ .

We start by characterizing the smoothness properties of  $J_D^{\mathcal{T},\alpha}(\mathbf{v})$ , the dual function of the Tsallis regularized LP.

**Lemma 23.** If  $\alpha \in (1, 2]$  the dual function  $J_D^{\mathcal{T},\alpha}(\mathbf{v})$  is  $\frac{\eta|\mathcal{S}||\mathcal{A}|}{\alpha}$ -smooth in the  $\|\cdot\|_2$  norm.

*Proof.* Recall that **PrimalReg- $\lambda$**  can be written as **RegLP**:

$$\begin{aligned} & \max_{\boldsymbol{\lambda} \in \mathcal{D}} \langle \mathbf{r}, \boldsymbol{\lambda} \rangle - F(\boldsymbol{\lambda}) \\ & \text{s.t. } \mathbf{E}\boldsymbol{\lambda} = \mathbf{b}. \end{aligned}$$

Where the regularizer ( $F(\boldsymbol{\lambda}) := \frac{1}{\eta} D_\alpha^{\mathcal{T}}(\boldsymbol{\lambda} \parallel \mathbf{q})$ ) is  $\frac{\alpha}{\eta} \|\cdot\|_2$  strongly convex. In this problem  $\mathbf{r}$  corresponds to the reward vector, the vector  $\mathbf{b} = (1-\gamma)\boldsymbol{\mu} \in \mathbb{R}^{|\mathcal{S}|}$  and matrix  $\mathbf{E} \in \mathbb{R}^{|\mathcal{S}| \times |\mathcal{S}| \times |\mathcal{A}|}$  takes the form:

$$\mathbf{E}[s, s', a] = \begin{cases} \gamma \mathbf{P}_a(s|s') & \text{if } s \neq s' \\ 1 - \gamma \mathbf{P}_a(s|s) & \text{o.w.} \end{cases}$$

Therefore (since  $\|\mathbf{E}\|_{2,2}$  is simply the Frobenius norm of matrix  $\mathbf{E}$ ),

$$\|\mathbf{E}\|_{2,2} \leq 2|\mathcal{S}||\mathcal{A}|$$

The result follows as a corollary of Lemma 1. □

Throughout this section we use the notation  $D_{\mathcal{T},\alpha}$  to refer to  $\|\mathbf{v}^*\|_\infty \leq \frac{1}{1-\gamma} \left( 1 + \frac{2}{\eta(\alpha-1)\beta^{\alpha-1}} \right)$ . We are ready to prove convergence guarantees for Algorithm 4 when applied to the objective  $J_D^{\mathcal{T},\alpha}$ .

**Lemma 24.** Let Assumptions 1, 2 and 3 hold. Let  $\mathcal{D}_{\mathcal{T},\alpha} = \{\mathbf{v} \text{ s.t. } \|\mathbf{v}\|_\infty \leq D_{\mathcal{T},\alpha}\}$ , and define the distance generating function to be  $w(\mathbf{x}) = \|\mathbf{x}\|_2^2$ . After  $T$  steps of Algorithm 4 the objective function  $J_D^{\mathcal{T},\alpha}$  evaluated at the iterate  $\mathbf{v}_T = y_T$  satisfies:

$$J_D^{\mathcal{T},\alpha}(\mathbf{v}_T) - J_D^{\mathcal{T},\alpha}(\mathbf{v}^*) \leq 4\eta \frac{|\mathcal{S}|^2 |\mathcal{A}|}{\alpha} \frac{(1+c')^2}{(1-\gamma)^2 T^2}.$$

Where  $c' = \frac{2}{\eta(\alpha-1)\beta^{\alpha-1}}$ .

*Proof.* This results follows simply by invoking the guarantees of Theorem 1, making use of the fact that  $J_D^{\mathcal{T},\alpha}$  is  $\frac{\eta|\mathcal{S}||\mathcal{A}|}{\alpha}$ -smooth as proven by Lemma 3, observing that as a consequence of Lemma 22,  $\mathbf{v}^* \in \mathcal{D}_{\mathcal{T},\alpha}$  and using the inequality  $\|\mathbf{x}\|_2^2 \leq |\mathcal{S}|\|\mathbf{x}\|_\infty^2$  for  $\mathbf{x} \in \mathbb{R}^{|\mathcal{S}|}$ . □

Lemma 24 can be easily turned into the following guarantee regarding the dual function value of the final iterate:

**Corollary 6.** *Let  $\epsilon > 0$ . If Algorithm 4 is ran for at least  $T$  rounds*

$$T \geq 2\eta^{1/2}(|\mathcal{S}||\mathcal{A}|^{1/2}) \frac{(1+c')}{\alpha^{1/2}(1-\gamma)\sqrt{\epsilon}}$$

*then  $\mathbf{v}_T$  is an  $\epsilon$ -optimal solution for the dual objective  $J_D^{T,\alpha}$ .*

If  $T$  satisfies the conditions of Corollary 6 a simple use of Lemma 6 allows us to bound the  $\|\cdot\|_2$  norm of the dual function's gradient at  $\mathbf{v}_T$ :

$$\|\nabla J_D(\mathbf{v}_T)\|_2 \leq \sqrt{\frac{2|\mathcal{S}||\mathcal{A}|\eta\epsilon}{\alpha}}$$

If we denote as  $\pi_T$  to be the policy induced by  $\lambda^{\mathbf{v}_T}$ , and  $\lambda_\eta^*$  is the candidate dual solution corresponding to  $\mathbf{v}^*$ . A simple application of Lemma 21 yields:

$$J_P(\lambda^{\pi_T}) \geq J_P(\lambda_\eta^*) - \frac{1}{1-\gamma} (2+c+c') \sqrt{\frac{2|\mathcal{S}||\mathcal{A}|\eta\epsilon}{\alpha}}$$

Where  $c = \frac{1}{\eta(\alpha-1)} \frac{1}{\beta^{\alpha-1}} \left( \max(\alpha-1, \frac{2}{\rho^{\alpha-1}}) + 2 \right)$ ,  $c' = \frac{2}{\eta(\alpha-1)\beta^{\alpha-1}}$  and  $\lambda_\eta^*$  is the  $J_P$  optimum.

This leads us to the main result of this section:

**Corollary 7.** *Let  $\alpha \in (1, d]$ . For any  $\xi > 0$ . If  $T \geq 4\eta|\mathcal{S}|^{3/2}|\mathcal{A}|^{1/2} \frac{(2+c+c')^2}{\alpha(1-\gamma)^2\xi}$  then:*

$$J_P(\lambda^{\pi_T}) \geq J_P(\lambda_\eta^*) - \xi.$$

Thus Algorithm 4 achieves an  $\mathcal{O}(1/(1-\gamma)^2\epsilon)$  rate of convergence to an  $\epsilon$ -optimal regularized policy. We now proceed to show that an appropriate choice for  $\eta$  can be leveraged to obtain an  $\epsilon$ -optimal policy.

**Theorem 5.** *For any  $\epsilon > 0$ , let  $\eta = \frac{2}{(\alpha-1)\epsilon\beta^\alpha}$ . If  $T \geq 8|\mathcal{S}|^{3/2}|\mathcal{A}|^{1/2} \frac{(2+c+c')^2}{(\alpha-1)\alpha(1-\gamma)^2\beta^\alpha\epsilon^2}$ , then  $\pi_T$  is an  $\epsilon$ -optimal policy.*

*Proof.* As a consequence of Corollary 7 we can conclude that:

$$J_P(\lambda^{\pi_T}) \geq J_P(\lambda^{*,\eta}) - \frac{\epsilon}{2}.$$

Where  $\lambda_\eta^*$  is the regularized optimum. Recall that:

$$J_P(\lambda) = \sum_{s,a} \lambda_{s,a} \mathbf{r}_{s,a} - \frac{1}{(\alpha-1)\eta} \left( \mathbb{E}_{(s,a) \sim \mathbf{q}} \left[ \left( \frac{\lambda_{s,a}}{\mathbf{q}_{s,a}} \right)^\alpha - 1 \right] \right).$$

Since  $\lambda^{*,\eta}$  is the maximizer of the regularized objective, it satisfies  $J_P(\lambda^{*,\eta}) \geq J_P(\lambda^*)$  where  $\lambda^*$  is the visitation frequency of the optimal policy corresponding to the unregularized objective. We can conclude that:

$$\begin{aligned} \sum_{s,a} \lambda_{s,a}^{\pi_T} \mathbf{r}_{s,a} &\geq \sum_{s,a} \lambda_{s,a}^* \mathbf{r}_{s,a} + \frac{1}{(\alpha-1)\eta} \left( \sum_{s,a} \mathbf{q}_{s,a} \left( \left( \frac{\lambda_{s,a}^{\pi_T}}{\mathbf{q}_{s,a}} \right)^\alpha - 1 \right) - \sum_{s,a} \mathbf{q}_{s,a} \left( \left( \frac{\lambda_{s,a}^*}{\mathbf{q}_{s,a}} \right)^\alpha - 1 \right) \right) - \frac{\epsilon}{2} \\ &= \sum_{s,a} \lambda_{s,a}^* \mathbf{r}_{s,a} + \frac{1}{(\alpha-1)\eta} \left( \sum_{s,a} \mathbf{q}_{s,a} \left( \frac{\lambda_{s,a}^{\pi_T}}{\mathbf{q}_{s,a}} \right)^\alpha - \sum_{s,a} \mathbf{q}_{s,a} \left( \frac{\lambda_{s,a}^*}{\mathbf{q}_{s,a}} \right)^\alpha \right) - \frac{\epsilon}{2} \\ &\geq \sum_{s,a} \lambda_{s,a}^* \mathbf{r}_{s,a} - \frac{1}{(\alpha-1)\eta} \left( \frac{1}{\beta} \right)^\alpha - \frac{\epsilon}{2} \end{aligned}$$

And therefore if  $\eta = \frac{2}{(\alpha-1)\epsilon\beta^\alpha}$ , we can conclude that:

$$\sum_{s,a} \lambda_{s,a}^{\pi_T} \mathbf{r}_{s,a} \geq \sum_{s,a} \lambda_{s,a}^* \mathbf{r}_{s,a} - \epsilon.$$

□
